## 19 **Abstract**

20 Long interspersed nuclear elements (LINEs) play essential role in shaping chromatin state,  
21 while the factors that cooperate with LINEs and their roles in higher-order chromatin  
22 organization remain poorly understood. Here we show that MATR3, a nuclear matrix protein,  
23 interplays with antisense LINE1 (AS L1) RNAs to form into a gel-like meshwork via phase-  
24 separation, providing a partially dynamic platform for chromatin spatial organization. Either  
25 depletion of MATR3 or AS L1 RNAs changes nuclear distribution of each other and leads to  
26 chromatin reorganization in the nucleus. After MATR3 depletion, topologically associating  
27 domains (TADs) that highly transcribed MATR3-associated AS L1 RNAs showed a decrease  
28 on local chromatin interactions. Furthermore, amyotrophic lateral sclerosis (ALS)-associated  
29 MATR3 mutants alter biophysical features of the MATR3-AS L1 RNA meshwork and cause  
30 chromatin reorganization. Collectively, we revealed an essential role of meshwork formed by  
31 nuclear matrix and retrotransposon-derived RNAs in gathering chromatin in the nucleus.

## 32 **Main**

33 Non-coding RNAs (ncRNAs) can act as structural molecules participating in genome  
34 organization, mostly through interacting with the chromatin near their transcription loci<sup>1</sup>.  
35 RNA-binding proteins (RBPs) contribute to the *in-cis* interaction, and ncRNAs may promote  
36 liquid-liquid phase separation (LLPS) of RBPs, further facilitating the chromatin  
37 compaction<sup>1-4</sup>. Besides conventional ncRNAs, repeat element derived RNAs play important  
38 roles in the organization of higher-order chromatin architecture. For example, telomeric  
39 repeat containing RNA TERRA and major satellites (MajSAT) RNAs are essential for the  
40 higher-order organization of telomeres<sup>5</sup> and the pericentric heterochromatin<sup>6</sup>, respectively.  
41 Furthermore, C<sub>0</sub>T-1 repeat RNAs (including LINEs and SINEs) associate with euchromatin  
42 and the nascent repeat-rich RNAs function as scaffolds countering DNA compaction<sup>7, 8</sup>.

43 LINE1(L1) repeat elements comprise 17% and 19% genomic region in human and  
44 mouse, respectively<sup>9, 10</sup>. Based on the observation that the X chromosome has higher L1  
45 composition than autosomes, it suggested the role of L1 elements as “boosters” during X-

46 chromosome inactivation (XI)<sup>11-13</sup>. Further investigations showed that silent LINES are  
47 involved in heterochromatin compartmentalization at early XI, and the actively-transcribed  
48 LINES (young LINES) help to spread the inactive state to escape-prone regions, promoting  
49 facultative heterochromatin compaction at late stage of XI<sup>14, 15</sup>. L1 repeat RNAs were shown  
50 to interact with the chromatin domains from where they were transcribed<sup>7, 16</sup>. Functionally,  
51 sense-transcribed L1 RNAs can act as the nuclear scaffold, recruiting Nucleolin/KAP1  
52 proteins to inactivate 2C-related Dux-loci<sup>17</sup>. Further studies showed that N6-methyladenosine  
53 (m6A) marks on these chromatin-associated L1 RNAs help regulating chromatin accessibility  
54 by recruiting m6A reader YTHDC1 or m6A eraser FTO, further affecting histone  
55 modification on nearby chromatin<sup>18-20</sup>. As for L1 RNAs in higher-order chromatin  
56 organization, a recent study demonstrated that L1 elements and their transcripts may instruct  
57 the segregation of inactive B compartments, and depletion of sense-transcribed L1 RNAs in  
58 ESCs disrupted the homotypic contacts between L1-rich chromosome regions<sup>21</sup>; CBX5/HP1 $\alpha$   
59 and L1 RNAs may phase-separate into larger liquid droplets and promote heterochromatin  
60 compaction<sup>21</sup>. Of note, L1 elements and their transcripts are widespread distributed in  
61 nucleus, while HP1 $\alpha$  proteins mainly distribute as large foci in the nucleus, suggesting other  
62 factors may also work with L1 RNAs in chromatin structure organization.

63 In this study, we revealed functional roles of antisense-transcribed L1 (AS L1) RNAs  
64 and a nuclear matrix (NM) protein Matrin-3 (MATR3) in chromatin organization. NM is a  
65 network-like nuclear structure proposed as the platform for various functions in the nucleus<sup>22</sup>,  
66 <sup>23</sup>. Although it has long been hypothesized that NM scaffolds the chromatin organization<sup>24, 25</sup>,  
67 the roles of NM components in 3D genome organization just began to be revealed. Recently,  
68 we demonstrated that NM proteins SAF-A/HNRNPU and SAFB can regulate the higher-order  
69 organization of euchromatin and heterochromatin at the genome-wide scale, respectively<sup>6, 26</sup>.  
70 Interestingly, the functional roles of SAF-A/HNRNPU and SAFB in chromatin organization  
71 were dependent on chromatin-associated RNAs<sup>6, 27</sup>. MATR3 is one of the first identified NM  
72 components that presents unique physicochemical properties<sup>28</sup>. Functionally, MATR3 is  
73 implicated in pre-mRNA splicing<sup>29-31</sup> and affect biological processes including pluripotency

74 maintenance<sup>32,33</sup> and X chromosome inactivation (XI)<sup>2,34</sup>. A recent 3D genome study in  
75 erythroid cells showed that MATR3 stabilizes the chromatin occupancy of CTCF and cohesin  
76 at a subset of sites; loss of MATR3 affects weak-insulated topologically associating domains  
77 (TADs) and accelerates cell fate transition<sup>35</sup>. Here we show that MATR3 mediates chromatin  
78 interaction by interacting with AS L1 RNAs, which may enhance our understandings of  
79 repeat RNAs in chromatin organization.

80

## 81 **Results**

### 82 **MATR3 regulates the spatial organization of nuclear chromatin.**

83 To investigate the fine scale localization pattern of MATR3 in the nucleus, we performed  
84 super-resolution fluorescence microscopy and immuno-electron microscopy in mouse  
85 hepatocytes (AML12 cells), which had been applied in studying nuclear architecture  
86 previously<sup>6,26</sup>. The imaging data showed that MATR3 proteins organize into network-like  
87 structures with some concentrated puncta, which adjacent to chromatin fibers in the nucleus  
88 (**Fig. 1a** and **Extended Data Fig. 1a**). To determine the chromatin types associated with  
89 MATR3, we measured the correlation coefficient ( $r$ ) between MATR3 and histone marks on  
90 randomly selected regions of interest (ROI) in the nuclei. The nuclear distribution of MATR3  
91 showed the highest correlation with H3K27me3, comparing to other histone marks including  
92 H3K9me3, H3K9me2, H3K27ac or H3K4me3 (**Fig. 1b** and **Extended Data Fig. 1b**).

93 To reveal the biological function of MATR3 proteins in chromatin regulation, we  
94 established a doxycycline (Dox)-inducible, short hairpin RNA (shRNA)-based RNAi system<sup>36</sup>  
95 in AML12 cells. Using this system, three days of Dox treatment can generate a knockdown of  
96 MATR3, and three days after Dox removal can restore the expression level consistent to the  
97 control group (**Fig. 1c**). We first investigated the chromatin changes within regions of  
98 different chromatin types by immunofluorescence staining. To quantify their distribution  
99 pattern, we measured the standard deviation (SD) values of pixel intensity in the whole  
100 nuclear region. After MATR3 depletion, SD values of H3K9me2 and H3K27me3 increased,  
101 and that of H3K27ac decreased. Among these histone marks, H3K27me3 showed the most

102 significant redistribution ( $p < 0.0001$ ) (**Fig. 1d**). For the following investigation, therefore, we  
103 took H3K27me3 as the representative mark to probe chromatin organization changes.  
104 H3K27me3 staining in the control group showed a relatively diffused distribution pattern with  
105 some irregular foci in the nucleus. After depletion of MATR3, H3K27me3 staining presented  
106 larger and brighter foci in the inner nucleus as well as near the nuclear periphery and the  
107 nucleolus (**Fig. 1e** and **Extended Data Fig. 1c**). To quantify the redistribution of H3K27me3-  
108 modified chromatin towards nuclear periphery or nucleolus, we analyzed the pixel signal  
109 distribution on randomly selected ROIs in Lamin A/C or C23 (a nucleolus marker) co-stained  
110 cells. The data indicated that H3K27me3-modified chromatin became significantly closer to  
111 the nuclear periphery and the nucleolus after MATR3 depletion (**Fig. 1f-g** and **Extended**  
112 **Data Fig. 1f-g**). Importantly, Dox removal for three days restored the H3K27me3 pixel  
113 intensity SD values and spatial distribution relative to nuclear periphery and nucleolus (**Fig.**  
114 **1e-g** and **Extended Data Fig. 1d,f,g**), suggesting a direct regulatory role of MATR3 on  
115 chromatin organization. Next, we asked whether the changes of H3K27me3 staining were due  
116 to the alteration of H3K27me3 modification levels. However, the total H3K27me3 level and  
117 the genome-wide profiles were largely unchanged upon MATR3 depletion, as indicated by  
118 western blotting (**Fig. 1h**) and ChIP-seq (**Fig. 1i** and **Extended Data Fig. 1e**) in AML12  
119 cells. Therefore, the changes of H3K27me3 staining reflected the spatial redistribution of  
120 chromatin rather than the alteration of histone modification levels.

121 To rule out the potential off-target of RNAi methods and other secondary effects after  
122 knockdown, we established an auxin (IAA)-inducible rapid protein degradation system<sup>37</sup> in  
123 mouse embryonic stem cells (ESCs), which can generate MATR3 degradation within 6 hours  
124 (**Fig. 1j**, **Extended Data Fig. 1j**). As AML12 cells cannot be cultured in clones, the acute  
125 MATR3 degradation is technically difficult in this cell line. In ES cells, we first evaluated co-  
126 localization between MATR3 and different types of chromatins. H3K27me3-modified  
127 chromatin showed positive correlation with MATR3, although the correlation in ES cells was  
128 weaker than that in AML12 cells (**Extended Data Fig. 1h,i**). After rapid degradation of  
129 MATR3, H3K27me3 in ES Cells showed larger and brighter staining near the nuclear

130 periphery (**Fig. 1k**), and the SD of H3K27me3 pixel intensity significantly increased  
131 accordingly (**Fig. 1l**). Collectively, the acute degradation of MATR3 in ES Cells and RNAi-  
132 based MATR3 knockdown in AML12 cells resulted in similar spatial changes of chromatin as  
133 probed by H3K27me3 staining

134

### 135 **MATR3 interacts with nuclear RNAs including antisense LINE1 RNAs.**

136 Nuclear RNAs were shown to participate in chromatin spatial organization<sup>38,39</sup>. As MATR3  
137 acts as an RNA-binding protein<sup>30,31,40</sup>, we wondered whether MATR3's functional role in  
138 chromatin organization is RNA-dependent. According to cell fractionation assay<sup>41</sup> followed  
139 by western blotting detection, most MATR3 proteins present in chromatin-associated fractions  
140 in control cells, but greatly delocalized from chromatin after RNA pol II inhibitor  
141 dichlororibofuranosylben-zimidazole (DRB) treatment or RNase A treatment (**Fig. 2a**).

142 Interestingly, immunofluorescent images showed that treating cells with RNA transcription  
143 inhibitor (DRB or  $\alpha$ -amanitin) or RNase A disrupted network of MATR3 proteins and led  
144 them forming into spheroidal puncta (**Fig. 2b** and **Extended Data Fig. 2a,c**). Moreover,  
145 deleting RNA recognition motifs (RRM1/2) of MATR3 proteins made MATR3 distribute as  
146 spheroidal foci, and the impact of RRM2 deletion was more prominent (**Extended Data Fig.**  
147 **2b**). Pixel signal of MATR3 and H3K27me3 is positively correlated ( $r=0.66$ ) in the control  
148 cell, but the correlation turned negative in the DRB ( $r=-0.36$ ) or RNase A ( $r=-0.13$ ) treated  
149 cells (**Fig. 2b** and **Extended Data Fig. 2c**). These data suggested that MATR3-chromatin  
150 association is RNA-dependent.

151 To further identify MATR3-associated RNAs in chromatin organization, we performed  
152 strand-specific RNA immunoprecipitation sequencing (RIP-seq) in AML12 and ES cells with  
153 an anti-MATR3 antibody. In total, 42.6% RIP-seq peaks were associated with intronic regions  
154 of annotated genes in AML12 cells (**Fig. 2c**), which is in accordance with MATR3 PAR-  
155 CLIP data from human neuronal cells<sup>30</sup> and eCLIP data from HepG2 cells<sup>42</sup>. And we noticed  
156 that 17.2% of MATR3 RIP-seq peaks were distributed at repeat sequences. By quantifying  
157 each category of repetitive elements (REs) according to peak numbers and median counts,

158 antisense (AS) L1 transcripts showed a strong association with MATR3 (**Fig. 2d,e**).  
159 Furthermore, for most of L1 subfamilies, the interactions between MATR3 and AS L1 RNAs  
160 were stronger than those between MATR3 and sense L1 RNAs (**Fig. 2f**). Our data in ES cells  
161 (**Extended Data Fig. 2d**) and previous MATR3 eCLIP conducted in HepG2 cells<sup>42</sup> indicated  
162 the same results.

163 In order to visualize nuclear distribution of AS L1 RNAs, we performed fluorescent in-  
164 situ hybridization (FISH) in AML12 cells. Probes for RNA FISH were designed according to  
165 the consensus sequence of antisense transcripts from L1\_Mus 1 subfamily, which ranked high  
166 on MATR3-associated AS L1 subfamilies (**Fig. 2f**). Remarkably, nuclear localization of AS  
167 L1 RNAs was highly correlated with that of MATR3 in both AML12 ( $r=0.76$ ) (**Fig. 2g**) and  
168 ES ( $r=0.52$ ) cells (**Extended Data Fig. 2e**), displaying a meshwork-like structure in the  
169 nucleus. Imaging data in AML12 cells showed that AS L1 RNAs were positively correlated  
170 with H3K27me3-modified chromatin ( $r=0.52$ ), but negatively correlated with H3K27ac-  
171 modified chromatin ( $r=-0.43$ ) (**Fig. 2g**). We then investigated the genomic features on  
172 MATR3-associated L1 elements in AML12 cells. MATR3-associated sense and AS L1 RNAs  
173 tended to be transcribed from different L1 elements, which are enriched for H3K27me3,  
174 H3K9me2 and H3K9me3 histone modifications (**Fig. 2h**).

175 Together, our genomic and imaging data revealed an extensive interaction between  
176 MATR3 and AS L1 RNAs.

177

### 178 **MATR3-AS L1 meshwork shapes the nuclear chromatin architecture.**

179 Next, we investigated the functional roles of the MATR3-AS L1 meshwork in higher-order  
180 chromatin organization. We tested whether AS L1 RNAs affect MATR3's function in  
181 chromatin organization by treating AML12 cells with antisense oligonucleotides (ASOs) to  
182 knockdown AS L1 RNAs (**Extended Data Fig. 2f**). After 6 hours of AS L1 ASOs treatment,  
183 22% of cells showed MATR3 forming into spheroidal foci in the nucleus; after 12 and 24  
184 hours, this kind of cells increased to 53% and 65%, respectively. Moreover, a small portion of  
185 cells appeared spheroidal foci in both nucleus and cytoplasm (**Extended Data Fig. 2g, h**).

186 Immunofluorescent staining revealed that after AS L1 knockdown, MATR3 foci disassociated  
187 from H3K27me3-modified chromatin ( $r=0.66$  in Ctrl ASO;  $r=-0.11$  in AS L1 ASO), resulted  
188 in a redistribution of H3K27me3 which shown as larger foci in the nucleus (**Fig. 3a**).  
189 Furthermore, SD of H3K27me3 pixel intensity significantly increased in AS L1 ASOs treated  
190 cells (**Fig. 3b**). The spatial alteration of H3K27me3 upon AS L1 depletion is similar as the  
191 phenomenon caused by MATR3 knockdown, which suggested that AS L1 RNAs may  
192 function as ‘RNA Glue’ for MATR3 proteins in maintaining the meshwork structure and their  
193 association with nuclear chromatin.

194 We further investigated whether MATR3 affects the localization of AS L1 RNAs.  
195 Immunofluorescent images showed a redistribution of AS L1 RNAs after MATR3 depletion:  
196 compared to the meshwork-like organization in control cells, AS L1 RNAs appeared a more  
197 dispersed distribution in MATR3 depleted cells (**Fig. 3c**). To quantify these changes, we  
198 analyzed the Gaussian fit distribution curve of the fluorescence signal. Distribution of AS L1  
199 RNAs in control cells is right-skewed with a mean value greater than mode value and a  
200 skewness greater than zero, which suggested the presence of concentrated distribution in  
201 partial areas. After MATR3 depletion, however, the fluorescence signals of AS L1 RNAs  
202 nearly followed a standard Gaussian distribution with a mean value nearly equal to mode  
203 value and a skewness close-to-zero, which suggested a random distribution (**Fig. 3c,d**).

204 MATR3 protein has two zinc finger (ZF) domains and two RNA recognition motifs  
205 (RRMs)<sup>43</sup>. We wondered which domains are necessary for MATR3 to interact with AS L1  
206 RNAs. We expressed GFP-tagged MATR3 truncations ( $\Delta ZF1$ ,  $\Delta ZF2$ ,  $\Delta RRM1$  and  $\Delta RRM2$ )  
207 in endogenous MATR3-depleted AML12 cells and examined their colocalization with AS L1  
208 RNAs. The deletion of ZF1 or ZF2 did not affect the MATR3 distribution and its association  
209 with AS L1 RNAs. The deletion of RRM1 and RRM2 both affect MATR3 distribution, but  
210 only RRM2 deletion abolished MATR3’s association with AS L1 RNAs (**Fig. 3e,f**).  
211 Therefore, RRM2 domain is essential for MATR3 to bind with AS L1 RNAs.

212 Collectively, these results indicated that AS L1 RNAs and MATR3 affect cellular  
213 localization of each other and loss of either of them could lead to the redistribution of



214 chromatin. AS L1 RNAs and MATR3 act together to form a meshwork-like structure that help  
215 to shape the chromatin architecture in cell nuclei.

216

### 217 **Phase-separation facilitates the formation of MATR3-AS L1 meshwork.**

218 To investigate the physical characters of the meshwork formed by MATR3 and AS L1 RNAs,  
219 we first tested its dynamic feature in GFP-MATR3-expressed AML12 cells with fluorescence  
220 recovery after photobleaching (FRAP) assay. After a period of 20 seconds, the bleached area  
221 recovered fluorescence intensity to half of the initial (**Fig. 4a,b**), indicating that the MATR3  
222 meshwork is partially dynamic.

223 Recent studies have revealed dynamic nuclear compartments driven by the liquid-liquid  
224 phase separation (LLPS) of proteins and/or RNAs<sup>44, 45</sup>. To test the phase-separation potential  
225 of MATR3 proteins, we expressed and purified GFP-tagged MATR3 proteins and performed  
226 the *in vitro* droplet formation assay. As expected, GFP-MATR3 proteins formed spherical  
227 assemblies at room temperature; area of these assemblies increased with higher protein  
228 concentration and decreased with higher NaCl concentration (**Fig. 4c-f**). When incubating 3  
229  $\mu\text{M}$  of GFP-MATR3 proteins with total RNAs extracted from AML12 cells, 5-10 ng/ $\mu\text{l}$  of  
230 total RNAs facilitated GFP-MATR3 proteins to form larger irregular particles, while more  
231 than 20 ng/ $\mu\text{l}$  of total RNAs buffered these particles (**Extended Data Fig. 3a**). These results  
232 are in agreement with reported features of phase-separated proteins<sup>46</sup>.

233 To examine roles of repeat RNAs in shaping MATR3 condensates *in vitro*, we incubated  
234 GFP-MATR3 proteins with various *in-vitro* transcribed, Cy5-modified repeat RNAs and  
235 observed their droplet formation behaviors. The B1 and major satellites (MajSAT) RNAs  
236 were transcribed from full-length B1 or MajSAT elements, respectively. As the full-length L1  
237 element is too long (~6kb), the L1 RNAs were transcribed from a 318bp-consensus sequence  
238 of L1 Md\_F2 elements (**Extended Data Fig. 3b**). Intriguingly, AS L1 RNAs facilitated  
239 MATR3 proteins forming into mesh-like assemblies *in vitro*. While under the same molecule  
240 concentration, other repeat RNAs only made MATR3 droplets to undergo a slight deformation  
241 (**Fig. 4g**).

242 To further interpret the action mechanisms of each repeat RNAs, we analyzed the  
243 numbers of MATR3-binding motifs<sup>30</sup> on them. As expected, only the AS L1 sequence  
244 contains MATR3-binding motifs. Furthermore, motif density on the 318nt-antisense L1  
245 Md\_F2 RNA fragment (4/318) is comparable to that on full-length antisense L1 Md\_F2 RNA  
246 (89/5948) and is much higher than that on full-length sense L1 Md\_F2 RNA (4/5948)  
247 (**Extended Data Fig. 3b**). Hence, we suggest that AS L1 RNA has a higher affinity to bind  
248 MATR3 proteins. In cell nuclei, MATR3 could stochastically interact with different RNAs  
249 due to electrostatic forces. Those non-specifically interacting RNAs would lower MATR3's  
250 saturation concentration and buffer the MATR3 liquids at high RNA concentration<sup>46, 47</sup>. While  
251 the specifically interacting RNAs like AS L1 RNAs could form multivalent interaction with  
252 MATR3 proteins, that may enhance the overall avidity<sup>48</sup> and promote the meshwork-like  
253 assembly formation.

254 Furthermore, when incubating 3 $\mu$ M of MATR3 proteins with different concentrations of  
255 AS L1 RNAs, 5nM to 200nM AS L1 RNAs could help the formation of the meshwork-like  
256 structure (**Fig. 4h**). According to a quantitative proteomics analysis, there are in average  
257 3,240,673 MATR3 protein molecules in each mammalian cell<sup>49</sup>. So, the estimated nuclear  
258 concentration of MATR3 protein is about 5.6  $\mu$ M (close to 3 $\mu$ M MATR3 concentration within  
259 *in vitro* system). In addition, it was estimated that about 1,000 L1 RNA copies were present in  
260 one mammalian cell<sup>39</sup>, with a concentration around 1 nM. Considering that some cellular AS  
261 L1 RNAs are full-length transcribed (containing ~20 copies of the 318nt-AS L1 RNA  
262 fragment) or have diverse motif density, we suggest the *in vitro* system containing 5nM to  
263 50nM 318nt-AS L1 RNA fragment (**Fig. 4h**) could nearly mimic the stoichiometric ratio  
264 between MATR3 and AS L1 RNAs *in vivo*.

265 In summary, we suggest that MATR3 proteins have the potential to undergo liquid-liquid  
266 phase separation, the weak interaction between proteins' disorder regions contribute to this  
267 behavior. When MATR3 proteins interact with AS L1 RNAs via the RRM2 domain, the  
268 affinity between molecules increased, thereby facilitating the higher-order MATR3-AS L1  
269 meshwork formation (**Fig. 4i**).

### 270 **3D genome organization changes upon MATR3 depletion.**

271 To study the role of MATR3 on 3D genome organization, we performed Hi-C in control and  
272 *Matr3*-depleted AML12 cells. We used DpnII and obtained over 140 million uniquely aligned  
273 read pairs per replicate (**Extended Data Fig. 4a**). Biological replicates from the same  
274 condition were highly correlated (**Extended Data Fig. 4b**) and then we merged replicates for  
275 further analysis. We next examined intrachromosomal interactions at different resolutions and  
276 found that the Hi-C contact maps in these two samples were similar (**Extended Data Fig. 4c**).  
277 Most of the compartments (97.7%) were unswitched after MATR3 knockdown (**Fig. 5a**).  
278 However, the degree of genome compartmentalization, as visualized by heatmaps of average  
279 contacts, showed compartment-specific alteration: increased in AA but decreased in BB  
280 compartments (**Fig. 5b**). Consistently, the interactions between compartment A regions  
281 increased but decreased between compartment B regions (**Fig. 5c**), and the interactions within  
282 compartment regions showed opposite trends (**Fig. 5d**).

283 We also observed the chromatin interaction changes within TADs changed upon MATR3  
284 knockdown (**Fig. 5e**). We then investigated the Hi-C data at TAD level. After MATR3  
285 depletion, 78.8% TAD boundaries were overlapped between Ctrl and shMATR3 samples (**Fig.**  
286 **5f**). By calculating the insulation score, TAD boundaries located in compartment A regions  
287 increased in boundary strength, while TAD boundaries located in compartment B regions and  
288 AB boundaries hardly changed. (**Fig. 5g**).

289 To test whether chromatin interactions at the TAD level were associated with the  
290 MATR3-AS L1 meshwork, we compared TADs with or without MATR3-associated AS L1  
291 RNAs, as indicated by MATR3 RIP-seq data. After MATR3 knockdown, the intra-TAD  
292 contacts within no-AS L1 TADs increased while decreased within with-AS L1 TADs (**Fig.**  
293 **5h**); TADs with the higher AS L1 density exhibited a greater degree of reduction in terms of  
294 intra-TAD contacts (**Fig. 5i**). Furthermore, TADs with the higher AS L1 density were more  
295 enriched in compartment A regions, while TADs with no AS L1 density were highly enriched  
296 in compartment B regions (**Fig. 5j**). The overall gene expression changes exhibited no trend  
297 along with AS L1 density in TADs (**Fig. 5k**). Therefore, our Hi-C data suggested that

298 MATR3-AS L1 meshwork confines local clustering of chromatin within TADs in which AS  
299 L1 RNAs are highly-transcribed, and most of these regions are in A compartment.

300

301 **MATR3-AS L1 meshwork maintain the expression stability of essential genes.**

302 We further asked whether the interplay between MATR3 and AS L1 RNAs contributes to  
303 gene regulation. We first examined the genomic distribution of the loci that transcribed  
304 MATR3-associated AS L1 RNAs. Results showed that 88% of them located in intronic  
305 regions of annotated genes (**Extended Data Fig. 5a**). We then examined genes that contain  
306 MATR3-associated AS L1 on gene body and tested changes of their expression level after  
307 MATR3 knockdown. After MATR3 knockdown, the genes containing MATR3-associated AS  
308 L1 were more susceptible to change their expression level (**Extended Data Fig. 5b**).

309 Subsequently, to investigate the functional relevance of MATR3-AS L1 meshwork, we  
310 examined genes that contain MATR3-associated AS L1 in intronic regions. MATR3 RIP-seq  
311 data in AML12 cells and ES cells were used for these analyses. Genes with AS L1 signals  
312 were highly overlapped between the two types of cells (**Extended Data Fig. 5c**). Gene  
313 Oncology (GO) and KEGG enrichment analyses indicated that the common genes were  
314 significantly enriched in survival-related pathways including cell cycle, cellular response to  
315 DNA damage stimulus and chromatin organization (**Extended Data Fig. 5d**). This partially  
316 explained the observation that cell growth was greatly impeded after MATR3 knock down  
317 (**Extended Data Fig. 5e**). Furthermore, AS L1-associated differentially expressed genes  
318 (DEGs) were significantly enriched in terms related to CNS development (neuron projection  
319 morphogenesis) and liver function (Cholesterol metabolism with Bloch and  
320 Kandutsch–Russell pathways) (**Extended Data Fig. 5f**).

321

322 **Amyotrophic lateral sclerosis-associated MATR3 mutations lead to chromatin**  
323 **redistribution.**

324 Multiple mutations of MATR3 were reported to be associated with neurodegenerative  
325 diseases including amyotrophic lateral sclerosis (ALS), frontotemporal dementia (FTD), vocal

326 cord and pharyngeal weakness with distal myopathy (VCPDM) and early onset  
327 neurodegeneration (EON)<sup>50-52</sup> (**Fig. 6a**). Nevertheless, how MATR3 dysfunction contributed  
328 to the pathology remained unclear. Aberrant LLPS behavior of neurodegenerative-disease-  
329 associated proteins was found to be pathogenic<sup>53</sup>. Therefore, we tested whether mutated  
330 MATR3 proteins lead to aberrant phase-separation. Predictor of natural disordered regions  
331 (PONDR) algorithm suggested that S85C and F115C, two ALS-associated mutations, could  
332 change the PONOR score of MATR3; particularly, the S85C mutation leads a disorder region  
333 shifting to an ordered one (**Fig. 6b**). We thus further investigated the action mechanism of  
334 these two MATR3 mutants.

335 We established a Dox-inducible MATR3 knockdown system in mouse neuroblastoma  
336 N2A cells, a common cell model for neurodegenerative disease studies, and then transfected  
337 GFP-tagged wild-type or the mutants of MATR3 (S85C and F115C) to replace the  
338 endogenous MATR3 protein (**Fig. 6c**). FRAP assay was used to investigate their dynamic  
339 features. We showed that 20 seconds after photobleaching, the fluorescence intensity of GFP-  
340 WT, GFP-F115C and GFP-S85C proteins recovered for 57%, 43%, and 20%, respectively,  
341 suggesting that these mutations make MATR3 proteins less dynamic in the nucleus (**Fig.**  
342 **6d,e**). Furthermore, we purified GFP-tagged human MATR3 WT and S85C proteins and  
343 performed *in vitro* droplet formation assay. The WT MATR3 formed into highly dynamic  
344 droplets while the S85C MATR3 proteins were much less dynamic and finally assembled into  
345 the fiber-like structure (**Fig. 6f, Supplementary Videos. 1,2**). To determine whether the  
346 mutation on MATR3 would alter its capacity to interact with AS L1 RNAs, we co-stained  
347 MATR3 proteins (WT/S85C/F115C) with AS L1 RNAs in N2A cells. Both wild-type and  
348 mutated MATR3 are well-colocalized with AS L1 RNAs in N2A cells (**Extended Data Fig.**  
349 **6a,b**).

350 Finally, we asked whether the MATR3 mutants could change nuclear chromatin  
351 distribution. As H3K27me3-modified chromatin showed the highest correlation with MATR3  
352 in N2A cells (**Extended Data Fig. 6c,d**), we remained to examine H3K27me3 changes in this  
353 cell line. After MATR3 depletion, H3K27me3 greatly redistributed in the nucleus with

354 brighter foci appeared; GFP-WT overexpression completely rescued this phenotype.  
355 However, neither GFP-S85C nor GFP-F115C rescued the redistribution of H3K27me3 (**Fig.**  
356 **6g,h**). These data suggested that ALS-associated MATR3 mutants have changes in their  
357 physical state which could further lead to an abnormal chromatin organization.

358

## 359 **Discussion**

360 Based on the data presented, we proposed that MATR3 proteins and AS L1 RNAs  
361 phase-separate into a partially dynamic meshwork that facilitate clustering of nearby  
362 chromatin (**Fig. 7**, Left). Mechanistically, upon transcribed, AS L1 RNAs that contain  
363 MATR3-binding motifs recruit MATR3 proteins *in-cis*, and the chromatin regions that  
364 interact with AS L1 RNAs could be gathered around the meshwork spatially (**Fig. 7**, Right).

365 NM was observed to be a network in high-salt extracted nucleus since a half century  
366 ago<sup>22</sup>. However, there have been few clear microscopic imaging data supporting for existence  
367 of NM in living cells, especially the inner NM<sup>54</sup>. Our super-resolution fluorescence  
368 microscopy (**Fig. 1a**) and immuno-electron microscopy (**Extended Data Fig. S1a**) data  
369 showed that MATR3, the representative NM protein, organize as a meshwork and locate on  
370 chromatin fibers in the intact nucleus, similar to previous observations in the extracted  
371 nucleus<sup>55</sup>. NM is an RNA-protein skeleton and most protein components are RNA-binding  
372 proteins<sup>56</sup>. Previous work used to take NM as an entirety, and suggested a consistent mode of  
373 action for NM proteins. Our data in this paper and our previous work on SAF-A/HNRNPU  
374 and SAFB, performed in the same cell line, indicate that different NM proteins act to regulate  
375 different chromatin regions<sup>6,26</sup>. Their preferential interaction RNAs may account for the  
376 discrepancy.

377 In this paper, we demonstrated the functional roles of AS L1 RNAs in chromatin  
378 organization. However, the biogenesis of AS L1 RNAs is still unclear. How do the antisense  
379 transcripts be regulated? Are there other partners of AS L1 except for MATR3? What is the  
380 function of AS L1 RNAs in development and diseases? Many questions regarding AS L1  
381 RNAs remain to be answered. Previous studies regarding LINEs-derived RNAs seldomly

382 distinguish their transcription orientation<sup>57-59</sup> or just focused on sense LINES<sup>15, 17, 18, 20</sup>. The  
383 functions and mechanisms of AS L1 RNAs in biological processes have not been well  
384 discussed. Based on ENCODE eCLIP datasets, AS L1 RNAs are associated with 9 RBPs  
385 (including MATR3, HNRNPM, SUGP2, etc.), and MATR3 eCLIP dataset in HepG2 cells  
386 showed the highest AS L1 RNA enrichment<sup>42</sup>. In this study, we revealed that AS L1 RNAs  
387 take part in chromatin organization by interplaying with MATR3. It may provide new insights  
388 for understanding biological functions of antisense repeat RNAs. Moreover, there are a great  
389 number of natural antisense transcripts (NATs) in human cells which is almost equal to sense  
390 transcripts, most (>91%) of them are ncRNAs<sup>60</sup>. NATs were suggested to interfere with the  
391 expression of sense mRNA through gene silencing, nuclear retention, epigenetic silencing or  
392 other mechanisms<sup>61, 62</sup>. Further investigations are needed to reveal the independent role of  
393 NATs, especially in the process of 3D genome organization.

394 Previous work reported that N-terminal of MATR3 could form liquid-like droplets in the  
395 cell nuclei of C2C12 mouse myoblasts, suggesting a phase-separation potential for MATR3<sup>63</sup>.  
396 This is further proved by the *in-vitro* droplet formation assays in our study. In addition, we  
397 demonstrate that MATR3 proteins and AS L1 RNAs comprise a nuclear scaffold, and they  
398 function together to maintain a partially dynamic environment for chromatin regulation.  
399 There have been a number of instances showing non-coding RNAs and RBPs undergo LLPS  
400 which promote cellular sub-compartments formation<sup>64</sup>. In the nucleolus, higher concentration  
401 of rRNA may strengthen heterotypic interactions between nucleolus marker proteins (e.g.,  
402 FBL, NPM1) and increase the nucleolus size<sup>65</sup>. The cytoplasmic lncRNA *NORAD* nucleate  
403 droplet formation of Pumilio RBPs (PUM1, PUN2); depletion of *NORAD* leads to dispersal  
404 of PUM proteins<sup>3</sup>. These studies revealed that under physiological conditions, higher  
405 RNA/protein ratio contributes to larger size of liquid-like phases. However, MATR3 proteins  
406 self-organize into liquid-like droplets in cell nuclei when depletion of RNAs; the existence of  
407 AS L1 RNAs may abolish the weak interaction between MATR3 proteins and resulted in a  
408 gel-like meshwork formation. This indicates that an increase of the AS L1 RNA/MATR3  
409 ratio may facilitate a liquid-to-gel phase transition. We suggest that the gel-like meshwork

410 structure reconciles the dynamics and stability, which is suitable for widespread chromatin  
411 regions to switch states in response to spatiotemporal cues.

412 Recently, knock-in mice models were developed to mimic the two ALS-associated  
413 MATR3 mutants (S85C and F115C), and only S85C mice recapitulated pathological features  
414 of ALS<sup>52, 66</sup>. In this study, we indicated that S85C shows greater effects on the chromatin mis-  
415 localization and protein dynamics than F115C does. A study on the engineered ALS/FTD  
416 model mice indicated an abnormal heterochromatin structure and increased staining of  
417 H3K27me3 in brain cells<sup>67</sup>. These data suggested that the pathology of S85C mutated ALS  
418 may be partially explained by dysregulation of chromatin organization. Our work showed that  
419 mutated MATR3 sustains the ability to interact with AS L1 RNAs, but its dynamic activity  
420 decreased. Biophysical changes on the MATR3-AS L1 RNA meshwork could decrease their  
421 capacity for responding to environmental signals. A previous work in *Drosophila* model of  
422 ALS reported change of L1 RNA expression<sup>68</sup>. Due to the lack of the strand-specific  
423 transcriptome datasets for ALS patients (and controls), we could not illustrate the change of  
424 MATR3 expression and AS L1 RNA constitution during ALS development. Further  
425 investigation focusing on AS L1 RNAs may provide new insights into ALS pathogenesis.  
426



## 427 **Methods**

428 **Dox-inducible shRNA system and stable express system in AML12 cells.** The mouse  
429 hepatocyte cell line alpha mouse liver 12 (AML12; CRL-2254, ATCC, Manassas, VA) were  
430 cultured in DMEM/F12 (11320033, Thermo Fisher Scientific, Waltham, MA) supplemented  
431 with 10% fetal bovine serum (16140071, Gibco, Grand Island, NY), ITS Liquid Media  
432 Supplement (100×, 41400045, Gibco), and 40 ng/ml dexamethasone (D4902, Sigma,  
433 Darmstadt, Germany) at 37°C and 5% CO<sub>2</sub>. For Dox-inducible MATR3-knock down system,  
434 plasmids were constructed by cloning the target sequences (The Matr3 shRNA target:  
435 GAGACCGATCTTGCTAATTA) to the pLKO-Tet-On vector<sup>36</sup> and then transfect AML12  
436 cells by lentivirus-based system. To generate stable cell lines, AML12 cells were selected in  
437 the presence of 1 ug/ml puromycin for 1 day. 1 ug/ml dox was used to induce MATR3  
438 depletion. For stable express cell lines, the GFP-tagged MATR3 cDNA were was cloned into  
439 Lv-ef1a-blastisidin-tre-MCS plasmid as described<sup>69</sup>. GFP-tagged truncations ( $\Delta$ ZF1,  $\Delta$ ZF2,  
440  $\Delta$ RRM1 and  $\Delta$ RRM2) were further constructed based on this plasmid using TOYOBO KOD-  
441 401 Kit, using primers as described<sup>70</sup>. Plasmid transfection in AML12 cells was  
442 accomplished by lentivirus-based system. To generate stable cell lines, AML12 cells were  
443 selected in the presence of 1 ug/ml puromycin and 4 ug/ml blasticidin for 2 days. 1 ug/ml dox  
444 was used to induce GFP-MATR3 (or its truncations) expression.

445

446 **Rapid protein degradation system in mouse ES cells.** The mouse ES cell line (E14TG2a)  
447 were cultured in 2i/LIF conditions as described<sup>71</sup>. The auxin (IAA) inducible MATR3  
448 degradation system was developed in mouse ESCs according to the rapid proteins depletion  
449 methods established by Natsume et al<sup>37</sup>. Firstly, the parental cells were generated by  
450 introducing the vector encoding constitutive cytomegalovirus-controlled auxin responsive F-  
451 box protein (CMV-OsTIR1) at the safe harbor ROSA26 using CRISPR/Cas<sup>72</sup>. Cells were  
452 further selected in the presence of 1 ug/ml puromycin. After 7 days, colonies were picked for  
453 further selection in a 96-well plate and the genotype was checked by genomic PCR. Based on  
454 this parental cell line, an in-frame mAID cassette was introduced after the last codon of

455 MATR3 gene by CRISPR/Cas (sgRNA target on Matr3 gene:  
456 ATAAATTGGCAGAAGAACGG). Plasmids were transfected with Lipofectamine™ 3000  
457 Transfection Reagent (L3000150, Thermo Fisher Scientific, Waltham, MA). To ensure AID-  
458 tagging on both alleles, two short homology donor vectors containing neomycin and  
459 hygromycin resistance markers were transfected simultaneously into cells. Cells were further  
460 selected in the presence of 2 mg/ml neomycin and 200 ug/ml hygromycin. After 7 days,  
461 colonies were picked for further selection in a 96-well plate and the genotype was checked by  
462 genomic PCR. 0.5mM IAA (dissolved in alcohol) was used to induce MATR3 degradation.

463

464 **Dox-inducible shRNA system and mutant transfection in N2A cells.** Mouse Neuro 2a cells  
465 (N2A; CCL-131, ATCC, Manassas, VA) were cultured in DMEM (Dulbecco's Modified  
466 Eagle's medium, Hyclone) supplemented with 10% fetal bovine serum, nonessential amino  
467 acids (11140050, Thermo Fisher Scientific) at 37°C and 5% CO<sub>2</sub>. Dox-inducible MATR3-  
468 Knock down system in N2A cells was established in the same way as in AML12 cells. To  
469 generate the shMATR3 resistant MATR3 cDNA, we introduced a synonymous mutation of  
470 shMATR3 targeting sites into the Lv-ef1a-GFP-MATR3 plasmid. And based on this plasmid,  
471 we further introduced MATR3 mutants (S85C/F115C) using TOYOBO KOD-401 Kit. Lv-  
472 ef1a-GFP-MATR3 WT/S85C/F115C (resistant) plasmids were separately transfected into the  
473 dox-inducible shMATR3 N2A cells, using standard Polyethylenimine (PEI)-based  
474 transfection approach.

475

476 **Western Blotting and Immunofluorescence.** For western blotting, the cell lysates were  
477 blotted against primary antibodies and the blots were visualized with peroxidase-coupled  
478 secondary antibodies using ProteinSimple FluorChem M gel imaging system. For  
479 immunofluorescence, cells were cultured on the glassy coverslip, fixed by 4% formaldehyde  
480 for 10 min, treated by 0.5% Triton X-100 for 10 min, blocked by 4% BSA for 30 min at room  
481 temperature, cultured by diluted primary antibody overnight at 4°C, followed by adding  
482 second-fluorescence antibody for 1 hour at room temperature and stained with DAPI. Most

483 experiments involving MATR3 antibody were performed by Bethyl (A300-591A), which  
484 recognizes carboxy-terminal of MATR3 protein and has higher antibody titers. There was an  
485 exception: for detecting the MATR3 degradation efficiency in mouse ES cells. As mAID-tag  
486 blocked the antigen-binding sites of the carboxy-terminal MATR3 prote  
487 in, which could not be recognized by Bethyl (A300-591A), we used the amino-terminal  
488 MATR3 antibody (Abcam, ab51081) as an alternative. Other antibody used in this paper as  
489 follows: anti-H3K9me3 (ABclonal, A2360), anti-H3K9me2 (ABclonal, A2359), anti-  
490 H3K27me3 (ABclonal, A16199), anti-H3K27ac (Active Motif, 39133), anti-H3K4me3  
491 (ABclonal, A2357), anti- $\beta$ actin (Proteintech, 66009-1-Ig), anti-H3 (Abcam, ab1791).

492

493 **RNA fluorescence in situ hybridization (RNA FISH).** RNA fluorescence in situ  
494 hybridization was performed using RNAscope® Multiplex Fluorescent Reagent Kit v2 (ACD,  
495 323100). Probes for AS L1 RNA were designed by ACD company (Advanced Cell  
496 Diagnostics, Hayward, CA, USA) based on the consensus sequence on antisense L1\_Mus1  
497 RNAs. The RNAscope experiment were performed according to the standard RNAscope  
498 protocol without protease treating, and then the slides were re-fixed with 4% PFA followed  
499 by the standard protocol of immunofluorescence.

500

501 **Immuno-electron microscopy.** Cells were fixed with 4% formaldehyde and incubated with  
502 the primary antibody. The HRP secondary antibody was used to detect the primary antibody  
503 and then using DAB (P0203, Beyotime) for the HRP staining, the product is EM-visible.  
504 After that, the samples were prepared for conventional transmission electron microscope. In  
505 brief, cells were fixed with 2.5% glutaraldehyde, followed by 1% osmium tetroxide treating,  
506 gradient dehydration with alcohol, dehydrated with acetone and embedded with resin. The  
507 sections were imaged at the EM facility of ION (Institute of Neuroscience, Shanghai, China).

508

509 **Chromatin immunoprecipitation sequencing (ChIP-Seq) assay.** ChIP experiments were  
510 performed as previously described<sup>73</sup>, antibody against H3K9me3 (Abcam, ab8898),

511 H3K9me2 (Abcam, ab1220), H3K27me3 (ABclonal, A16199) and H3K27ac (Active Motif,  
512 39133) were used. Cells were fixed with 1% formaldehyde for 10 min at room temperature.  
513 The libraries were prepared using the VAHTS Universal DNA Library Prep Kit for Illumina  
514 V3 (Vazyme, ND607-01) followed by next-generation sequencing (NGS) using the Illumina  
515 HiSeq X Ten system.

516

517 **Assay for transposase-accessible chromatin with high-throughput sequencing (ATAC-**  
518 **seq).** ATAC-seq experiments were performed as described <sup>74</sup>. For each sample,  $4 \times 10^4$   
519 AML12 cells were used. The transposition reaction was incubated at 37 °C for 40 min. The  
520 libraries were prepared using the TruePrep DNA Library Prep Kit V2 for Illumina (Vazyme,  
521 TD501-01) followed by next-generation sequencing (NGS) using the Illumina HiSeq X Ten  
522 system.

523

524 **Analysis of subcellular protein fractions.** Cells were washed once with 1×PBS and were  
525 processed into chromatin-non-associated and chromatin-associated fractions as described <sup>41</sup>.  
526 For RNase A treatment, final concentration of 10µg/ml RNase A (EN0531, Thermo Fisher  
527 Scientific) were added to the lysis buffer. The extracts were diluted with equal volume 1×SDS  
528 loading buffer and proteins in each fraction were detected by western blotting.

529

530 **RNA immunoprecipitation sequencing (RIP-Seq).** RIP experiments were performed as  
531 previously described <sup>75</sup>. Briefly, AML12 cells were cross-linked with UV (4000J), the cell  
532 nuclei were extracted and sonicate. Then incubated the supernatant with anti-IgG (CST 2729)  
533 or anti-MATR3 (Bethyl, A300-591A) antibodies overnight at 4°C. After wash for 3 times in  
534 RIP buffer and elution in 65°C, the RNA samples were extracted with Trizol. Genomic DNA  
535 was digested with DNase I (EN0523, Thermo Fisher Scientific) at 37°C for 1h. The libraries  
536 were prepared using the VAHTS Total RNA-seq (H/M/R) Library Prep Kit for Illumina  
537 (Vazyme, NRM603-01) followed by next-generation sequencing (NGS) using the Illumina  
538 HiSeq X Ten system.

539

540 **Antisense oligonucleotides (ASOs) treatment.** Cells were adherently cultured to about 60%  
541 confluency, then the antisense oligonucleotides were added to the culture medium using  
542 Lipofectamine™ RNAiMAX transfection reagent (13778030, Thermo Fisher Scientific). The  
543 final concentration of ASOs is 100mM. ASO target for AS L1 RNA was chose on the  
544 consensus sequence on antisense L1\_Mus1 RNAs. The following sequences were used:  
545 Scramble-ASO (CCUCCCTGAAGGTTCCUCC)<sup>6</sup>; AS L1-ASO  
546 (UAUUGUUGUUUCACCUAUAG).

547

548 **Fluorescent recovery after photobleaching (FRAP).** The FRAP was performed as  
549 described before <sup>6</sup>. Briefly, captured one image at pre-bleach, and then an approximately  
550 1mm<sup>2</sup> region was selected to bleach once with maximum light intensity, following images  
551 were captured every 1.3 s on a confocal laser scanning microscopy (Leica TCS SP5, Wetzlar,  
552 Germany). Image data analyses was performed using LAS AF Lite software (Leica  
553 Microsystems, Wtzlar, Germany).

554

555 ***In-vitro* droplet formation assay. (1) Protein purification.** The GFP-mouse MATR3 (or  
556 human MATR3 WT/S85C) cDNA was cloned into the pCAG-flag-6×His plasmid and then  
557 transfected into HEK293T cells. The proteins were first purified with Ni Agarose 6 FF  
558 (AOGMA) with the AKTA system (GE Healthcare Life Sciences) and further purified with  
559 anti-Flag affinity beads. After concentrated in an Amicon Ultracel-50K spin concentrator to  
560 exchange the storage buffer [50 mM Tris-HCl (pH 7.5), 200 mM NaCl, 1 mM DTT, 10%  
561 glycerol], the proteins were stored in -80°C after flash freezing in liquid nitrogen.

562 **(2) *In-vitro* RNA transcription.** cDNA of L1, B1 and MajSAT containing T7 promoter  
563 sequence and restriction sites hanging on both sides (in opposite orientation) were cloned to  
564 the PUC57 vector. And then, linearize the vector with endonuclease for sense- or antisense-  
565 oriented transcription, separately. RNAs were transcribed *in-vitro* using TranscriptAid T7  
566 High Yield Transcription Kit (K0441, Thermo Fisher Scientific). UTP in this kit was replaced

567 by Cy5-modified UTP for RNA labeling. The sequences of B1 and MajSAT were obtained  
568 from previous reports<sup>76,77</sup> and the representative L1 sequence was a 318bp consensus  
569 sequence of L1 Md\_F2 elements. **(3) *In-vitro* droplet formation.** Proteins or the mix of protein  
570 and RNAs were diluted in PCR tubes at different concentrations in reaction buffer (50 mM  
571 Tris-HCl (pH 7.5), 5 mM DTT, 0.1% Triton x-100 and 50 to 800 mM NaCl). Then 3 ul mixed  
572 liquid was dropped on the living cell chamber and the images were captured with confocal  
573 laser scanning microscopy (Leica TCS SP5, Wetzlar, Germany). Image data analyses was  
574 performed using LAS AF Lite software (Leica Microsystems, Wetzlar, Germany).

575

576 **In situ Hi-C experiment.** The in situ Hi-C libraries were prepared as previously described<sup>78</sup>.  
577 In brief, cells (2.5 millions/sample) were crosslinked by 1% formaldehyde at 25°C for 10  
578 minutes. Then the cell chromatin was digested with 100U MboI at 37°C overnight.  
579 Subsequently, filled in the restriction fragment overhangs with biotin at 37°C for 1.5 hours  
580 and performed proximity ligation at room temperature for 4 hours. After protein degradation  
581 and crosslink reversal, DNA was purified by ethanol precipitation and were sheared to a size  
582 of 300-500bp. After size selection, the biotinylated DNA was pulled-down by streptavidin  
583 beads and then prepared for Illumine sequencing. The libraries were sequenced via the  
584 Illumina HiSeq X Ten system at Annoroad Gene Technology. Two biological replicates were  
585 performed for both control and MATR3-depleted AML12 cells.

586

587 **Image processing and quantification.** The images of immunofluorescence or RNA FISH  
588 were obtained with the confocal laser scanning microscopy (Leica TCS SP5, Wetzlar,  
589 Germany). To achieve the comparable image data between groups, the microscope parameters  
590 were kept unchanged in each set of experiment. To obtain the super-resolution images, we  
591 conducted confocal laser scanning microscopy using Leica TCS SP8 STED system, followed  
592 by processing the images with a deconvolution software Huygens Ver. Image data analysis  
593 was performed using LAS AF Lite software (Leica Microsystems, Wetzlar, Germany) and  
594 Image J software (Image J Software, National Institutes of Health, Bethesda, MD, USA).

595

596 **ChIP-seq data and ATAC-seq data processing.** CutAdapt v.1.16<sup>79</sup> was used to remove  
597 adaptor sequences from raw reads of ChIP-seq and ATAC-seq. Reads were mapped to mouse  
598 genome (mm10) using Bowtie (v1.2.3)<sup>80</sup>. Duplicate reads were excluded and kept only one  
599 read for each genomic site. BedGraph files were normalized for total mapped read counts  
600 using genomecov from bedtools v2.29.2<sup>81</sup>. The normalized reads density bigwig tracks were  
601 used for visualization with Integrative Genomics Viewer (IGV)<sup>82,83</sup>. H3K27me3 peaks were  
602 called using SICER<sup>84</sup>. To generate the ChIP-Seq signal distribution for interested regions, we  
603 calculated the average ChIP-Seq signal across these regions.

604

605 **RIP-Seq data processing.** RIP-Seq reads were mapped to mouse reference genome (mm10)  
606 using HISAT2 (v2.1.0)<sup>85</sup>, with parameters: --rna-strandness RF --dta. Peaks were called  
607 using MACS (v1.4.2)<sup>86</sup>. Read counts were generated using HTSeq-count (v0.6.1)<sup>87</sup>.  
608 BedGraph files were generated using genomecov from bedtools (v2.29.2)<sup>40</sup>. Integrative  
609 Genomics Viewer (IGV) was used for data visualization<sup>82,83</sup>.

610

611 **Hi-C data analysis. (I) Mapping and matrix generation.** For Hi-C data, paired-end reads  
612 were mapped, processed, and iterative correction (ICE) using HiC-Pro software (version  
613 2.11.4) (<https://github.com/nservant/HiC-Pro>)<sup>88</sup>. Read pairs were mapped to the mouse  
614 mm10 reference genome (<https://hgdownload.soe.ucsc.edu/downloads.html#mouse>) with end-  
615 to-end algorithm and “-very-sensitive” option. Singleton, multi-mapped, dumped, dangling,  
616 self-circle paired-end reads, and PCR duplicates were removed after mapping. To eliminate  
617 the possible effects on data analyses of variable sequencing depths, we randomly sampled  
618 equal numbers read pairs from each sample for downstream analyses. Valid read pairs were  
619 used to generate raw contact matrices at 100-kb, 250-kb and 1-Mb resolutions and applied  
620 iterative correction (ICE) on them. We converted .all ValidPairs files to .hic files by the script  
621 hicpro2juicebox.sh from HiC-Pro utilities. HiCExplorer (version 3.5.3)  
622 (<https://hicexplorer.readthedocs.io/en/3.5.3/>)<sup>89</sup> was used to compute correlations between

623 replicates and plot contact maps for ICE normalized matrices. **(2)** Identification of A and B  
624 Compartments. A and B compartments were identified as described previously<sup>90</sup>. For  
625 normalized contact matrix at 100-kb resolution, expected matrix were calculated as the sum  
626 of contacts per genomic distance divided by the maximal possible contacts and then converted  
627 to a pearson correlation matrix. Then, principal component analysis was performed on the  
628 correlation matrix. The first principal eigenvector (PC1) for each bin was used to calculate the  
629 overlap ratio with H3K27ac ChIP-seq peaks to assign each bin to A or B compartment.

630 *TAD calling* TADs were called by the insulation score method using cworld software  
631 (<https://github.com/dekkerlab/cworld-dekker>) as previously described<sup>91</sup>. Insulation scores  
632 was calculated by the cworld script “matrix2insulation.pl.” at 100-kb resolution matrix with  
633 the parameters “--im iqrMean --is 500000 --ids 250000 --nt 0.3”. The topologically associated  
634 domains were identified by the cworld script “insulation2tads.pl” and the 0.3 of min boundary  
635 strength was set as the threshold. **(3)** Aggregate contact frequency to compartments. In order  
636 to examine the relationship between PC1 values and contacts frequency, we sorted PC1  
637 values for all 100kb bins in decreasing order and divided into 50 equal quantile (**Fig. 5b**). We  
638 then built the 50x50 grid of 2D interval that x axis and y axis are 50 equal quantiles described  
639 above. Then in a 50x50 2D interval, we assigned the intra-chromosomal contacts to pairs of  
640 100kb loci in each grid and calculated the average contacts frequency. We then plotted  
641 heatmap to show average contacts frequency enrichment in Ctrl and shMatr3 samples and the  
642 fold change of contact frequency between them. **(4)** Average contact frequency for  
643 compartment regions. To quantify the average enrichment of contacts at compartment level,  
644 we first connected the continuous bins that have the same state of PC1 values in Ctrl defined  
645 as compartment regions. We then calculated average log ratio of the observed and the  
646 expected contacts for A/B intra-compartment regions and inter-compartment regions pairs  
647 between the same type (AA and BB) and different types (AB) in Ctrl and shMatr3. Finally,  
648 changes in compartment regions between Ctrl and shMatr3 were calculated and represented  
649 as boxplots (**Fig. 5c,d**). **(5)** Insulation score was computed by cworld software  
650 (<https://github.com/dekkerlab/cworld-dekker>)<sup>91</sup> at 50kb resolution using function



651 matrix2insulation.pl with parameters --is 1000000 --ids 200000 --nt 0.1. **(6)** TADs classified  
652 into MATR3-AS L1 RNAs associated TADs and non-associated TADs according to density of  
653 anti-MATR3 RIP-seq signal of AS L1 RNAs within TADs (**Fig. 5h**). MATR3-AS L1 RNAs  
654 associated TADs classified into four quantile groups by increasing in MATR3-AS L1 RNAs  
655 density (**Fig. 5i**). GO/KEGG analysis were performed using online software metacape  
656 (<https://metascape.org/gp/index.html#/main/>) (**Extended Data Fig. 5d,f**)

657

658 **Strand-specific RNA-Seq.** The libraries were prepared using the VAHTS Stranded mRNA-  
659 seq Library Prep Kit for Illumina (Vazyme, NR602-01) followed by next-generation  
660 sequencing (NGS) using the Illumina HiSeq X Ten system. Reads were mapped to mouse  
661 reference genome (mm10) using HISAT2 v2.1.0<sup>85</sup>, with parameters: --rna-strandness RF.  
662 FPKM values were calculated using StringTie v1.3.5<sup>92</sup> based on Refgene annotation from the  
663 UCSC genome browser, with parameters: --rf. Genes with FPKM  $\geq 1$  were considered to be  
664 expressed. Read counts were generated using HTSeq-count v0.6.1<sup>87</sup>. Differentially expressed  
665 genes (DEGs) were calculated using the R package DESeq2 v1.26.0<sup>93</sup>, Expression genes  
666 were considered differentially expressed if DESeq2 p-value  $< 0.1$  and  $|\log_2(\text{fold changes})| \geq$   
667 1. BedGraph format files were calculated using genomcov from bedtools v2.29.2<sup>81</sup>.  
668 Integrative Genomics Viewer (IGV) was used for data visualization in genome<sup>82, 83</sup>.

669

670 **Statistics and reproducibility.** Image data analyses was performed using LAS AF Lite  
671 software (Leica Microsystems, Wetzlar, Germany) and Image J software (Image J Software,  
672 National Institutes of Health, Bethesda, MD, USA). Statistical analyses were performed using  
673 GraphPad Prism (8.0) and Microsoft Excel. Representative data with  $\geq 3$  independent  
674 experiments were expressed as the mean  $\pm$  s.d. or mean  $\pm$  s.e.m. Significance testing were  
675 accomplished using unpaired two-tailed Student's t test. No statistical method was used to  
676 pre-determine the sample size. No data were excluded from the analyses. The western blots  
677 were performed in two or three independent biological replicates with similar results and a  
678 representative blot was shown. The CHIP-seq, RIP-seq, ATAC-seq and Hi-C were all

679 performed in two independent biological replicates. The details for each experiment are also  
680 provided in the figure legends.

681

## 682 **References**

- 683 1. Quinodoz, S.A. *et al.* RNA promotes the formation of spatial compartments in the  
684 nucleus. *Cell* **184**, 5775-5790 e5730 (2021).
- 685 2. Pandya-Jones, A. *et al.* A protein assembly mediates Xist localization and gene  
686 silencing. *Nature* **587**, 145-151 (2020).
- 687 3. Elguindy, M.M. & Mendell, J.T. NORAD-induced Pumilio phase separation is  
688 required for genome stability. *Nature* **595**, 303-308 (2021).
- 689 4. A, P. & Weber, S.C. Evidence for and against Liquid-Liquid Phase Separation in the  
690 Nucleus. *Noncoding RNA* **5** (2019).
- 691 5. Cusanelli, E., Romero, C.A. & Chartrand, P. Telomeric noncoding RNA TERRA is  
692 induced by telomere shortening to nucleate telomerase molecules at short telomeres.  
693 *Mol Cell* **51**, 780-791 (2013).
- 694 6. Huo, X. *et al.* The Nuclear Matrix Protein SAFB Cooperates with Major Satellite  
695 RNAs to Stabilize Heterochromatin Architecture Partially through Phase Separation.  
696 *Mol Cell* **77**, 368-383 e367 (2020).
- 697 7. Hall, L.L. *et al.* Stable COT-1 repeat RNA is abundant and is associated with  
698 euchromatic interphase chromosomes. *Cell* **156**, 907-919 (2014).
- 699 8. Creamer, K.M., Kolpa, H.J. & Lawrence, J.B. Nascent RNA scaffolds contribute to  
700 chromosome territory architecture and counter chromatin compaction. *Mol Cell* **81**,  
701 3509-3525 e3505 (2021).
- 702 9. Mouse Genome Sequencing, C. *et al.* Initial sequencing and comparative analysis of  
703 the mouse genome. *Nature* **420**, 520-562 (2002).
- 704 10. Taylor, M.S. *et al.* Affinity proteomics reveals human host factors implicated in  
705 discrete stages of LINE-1 retrotransposition. *Cell* **155**, 1034-1048 (2013).
- 706 11. Boyle, A.L., Ballard, S.G. & Ward, D.C. Differential distribution of long and short  
707 interspersed element sequences in the mouse genome: chromosome karyotyping by  
708 fluorescence in situ hybridization. *Proc Natl Acad Sci U S A* **87**, 7757-7761 (1990).
- 709 12. Lyon, M.F. X-chromosome inactivation: a repeat hypothesis. *Cytogenet Cell Genet*  
710 **80**, 133-137 (1998).
- 711 13. Bailey, J.A., Carrel, L., Chakravarti, A. & Eichler, E.E. Molecular evidence for a  
712 relationship between LINE-1 elements and X chromosome inactivation: the Lyon  
713 repeat hypothesis. *Proc Natl Acad Sci U S A* **97**, 6634-6639 (2000).
- 714 14. Chaumeil, J., Le Baccon, P., Wutz, A. & Heard, E. A novel role for Xist RNA in the  
715 formation of a repressive nuclear compartment into which genes are recruited when  
716 silenced. *Genes Dev* **20**, 2223-2237 (2006).
- 717 15. Chow, J.C. *et al.* LINE-1 activity in facultative heterochromatin formation during X  
718 chromosome inactivation. *Cell* **141**, 956-969 (2010).

- 719 16. Lu, J.Y. *et al.* Genomic Repeats Categorize Genes with Distinct Functions for  
720 Orchestrated Regulation. *Cell Rep* **30**, 3296-3311 e3295 (2020).
- 721 17. Percharde, M. *et al.* A LINE1-Nucleolin Partnership Regulates Early Development  
722 and ESC Identity. *Cell* **174**, 391-405 e319 (2018).
- 723 18. Chen, C. *et al.* Nuclear m(6)A reader YTHDC1 regulates the scaffold function of  
724 LINE1 RNA in mouse ESCs and early embryos. *Protein Cell* **12**, 455-474 (2021).
- 725 19. Liu, J. *et al.* N (6)-methyladenosine of chromosome-associated regulatory RNA  
726 regulates chromatin state and transcription. *Science* **367**, 580-586 (2020).
- 727 20. Wei, J. *et al.* FTO mediates LINE1 m(6)A demethylation and chromatin regulation in  
728 mESCs and mouse development. *Science* **376**, 968-973 (2022).
- 729 21. Lu, J.Y. *et al.* Homotypic clustering of L1 and B1/Alu repeats compartmentalizes the  
730 3D genome. *Cell Res* **31**, 613-630 (2021).
- 731 22. Berezney, R. & Coffey, D.S. Identification of a nuclear protein matrix. *Biochem*  
732 *Biophys Res Commun* **60**, 1410-1417 (1974).
- 733 23. Berezney, R. & Coffey, D.S. Nuclear matrix. Isolation and characterization of a  
734 framework structure from rat liver nuclei. *J Cell Biol* **73**, 616-637 (1977).
- 735 24. Paulson, J.R. & Laemmli, U.K. The structure of histone-depleted metaphase  
736 chromosomes. *Cell* **12**, 817-828 (1977).
- 737 25. Jackson, D.A., Dickinson, P. & Cook, P.R. The size of chromatin loops in HeLa cells.  
738 *EMBO J* **9**, 567-571 (1990).
- 739 26. Fan, H. *et al.* The nuclear matrix protein HNRNPU maintains 3D genome  
740 architecture globally in mouse hepatocytes. *Genome Res* **28**, 192-202 (2018).
- 741 27. Nozawa, R.S. *et al.* SAF-A Regulates Interphase Chromosome Structure through  
742 Oligomerization with Chromatin-Associated RNAs. *Cell* **169**, 1214-1227 e1218  
743 (2017).
- 744 28. Nakayasu, H. & Berezney, R. Nuclear matrices: identification of the major nuclear  
745 matrix proteins. *Proc Natl Acad Sci U S A* **88**, 10312-10316 (1991).
- 746 29. Coelho, M.B. *et al.* Nuclear matrix protein Matrin3 regulates alternative splicing and  
747 forms overlapping regulatory networks with PTB. *EMBO J* **34**, 653-668 (2015).
- 748 30. Uemura, Y. *et al.* Matrin3 binds directly to intronic pyrimidine-rich sequences and  
749 controls alternative splicing. *Genes Cells* **22**, 785-798 (2017).
- 750 31. Attig, J. *et al.* Heteromeric RNP Assembly at LINEs Controls Lineage-Specific RNA  
751 Processing. *Cell* **174**, 1067-1081 e1017 (2018).
- 752 32. Niimori-Kita, K., Tamamaki, N., Koizumi, D. & Niimori, D. Matrin-3 is essential for  
753 fibroblast growth factor 2-dependent maintenance of neural stem cells. *Sci Rep* **8**,  
754 13412 (2018).
- 755 33. Pollini, D. *et al.* Multilayer and MATR3-dependent regulation of mRNAs maintains  
756 pluripotency in human induced pluripotent stem cells. *iScience* **24**, 102197 (2021).
- 757 34. Chu, C. *et al.* Systematic discovery of Xist RNA binding proteins. *Cell* **161**, 404-416  
758 (2015).
- 759 35. Cha, H.J. *et al.* Inner nuclear protein Matrin-3 coordinates cell differentiation by  
760 stabilizing chromatin architecture. *Nat Commun* **12**, 6241 (2021).

- 761 36. Wiederschain, D. *et al.* Single-vector inducible lentiviral RNAi system for oncology  
762 target validation. *Cell Cycle* **8**, 498-504 (2009).
- 763 37. Natsume, T., Kiyomitsu, T., Saga, Y. & Kanemaki, M.T. Rapid Protein Depletion in  
764 Human Cells by Auxin-Inducible Degron Tagging with Short Homology Donors.  
765 *Cell Rep* **15**, 210-218 (2016).
- 766 38. Rinn, J. & Guttman, M. RNA Function. RNA and dynamic nuclear organization.  
767 *Science* **345**, 1240-1241 (2014).
- 768 39. Nozawa, R.S. & Gilbert, N. RNA: Nuclear Glue for Folding the Genome. *Trends Cell*  
769 *Biol* **29**, 201-211 (2019).
- 770 40. Salton, M. *et al.* Matrin 3 binds and stabilizes mRNA. *PLoS One* **6**, e23882 (2011).
- 771 41. Bhatt, D.M. *et al.* Transcript dynamics of proinflammatory genes revealed by  
772 sequence analysis of subcellular RNA fractions. *Cell* **150**, 279-290 (2012).
- 773 42. Van Nostrand, E.L. *et al.* Principles of RNA processing from analysis of enhanced  
774 CLIP maps for 150 RNA binding proteins. *Genome Biol* **21**, 90 (2020).
- 775 43. Hibino, Y. *et al.* Molecular properties and intracellular localization of rat liver nuclear  
776 scaffold protein P130. *Biochim Biophys Acta* **1759**, 195-207 (2006).
- 777 44. Stanek, D. & Fox, A.H. Nuclear bodies: news insights into structure and function.  
778 *Curr Opin Cell Biol* **46**, 94-101 (2017).
- 779 45. Lyon, A.S., Peeples, W.B. & Rosen, M.K. A framework for understanding the  
780 functions of biomolecular condensates across scales. *Nat Rev Mol Cell Biol* **22**, 215-  
781 235 (2021).
- 782 46. Maharana, S. *et al.* RNA buffers the phase separation behavior of prion-like RNA  
783 binding proteins. *Science* **360**, 918-921 (2018).
- 784 47. Wang, J. *et al.* A Molecular Grammar Governing the Driving Forces for Phase  
785 Separation of Prion-like RNA Binding Proteins. *Cell* **174**, 688-699 e616 (2018).
- 786 48. Bhat, P., Honson, D. & Guttman, M. Nuclear compartmentalization as a mechanism  
787 of quantitative control of gene expression. *Nat Rev Mol Cell Biol* **22**, 653-670 (2021).
- 788 49. Hein, M.Y. *et al.* A human interactome in three quantitative dimensions organized by  
789 stoichiometries and abundances. *Cell* **163**, 712-723 (2015).
- 790 50. Johnson, J.O. *et al.* Mutations in the Matrin 3 gene cause familial amyotrophic lateral  
791 sclerosis. *Nat Neurosci* **17**, 664-666 (2014).
- 792 51. Marangi, G. *et al.* Matrin 3 variants are frequent in Italian ALS patients. *Neurobiol*  
793 *Aging* **49**, 218 e211-218 e217 (2017).
- 794 52. Kao, C.S. *et al.* Selective neuronal degeneration in MATR3 S85C knock-in mouse  
795 model of early-stage ALS. *Nat Commun* **11**, 5304 (2020).
- 796 53. Zbinden, A., Perez-Berlanga, M., De Rossi, P. & Polymenidou, M. Phase Separation  
797 and Neurodegenerative Diseases: A Disturbance in the Force. *Dev Cell* **55**, 45-68  
798 (2020).
- 799 54. Razin, S.V., Iarovaia, O.V. & Vassetzky, Y.S. A requiem to the nuclear matrix: from  
800 a controversial concept to 3D organization of the nucleus. *Chromosoma* **123**, 217-224  
801 (2014).

- 802 55. Lagarkova, M.A., Svetlova, E., Giacca, M., Falaschi, A. & Razin, S.V. DNA loop  
803 anchorage region colocalizes with the replication origin located downstream to the  
804 human gene encoding lamin B2. *J Cell Biochem* **69**, 13-18 (1998).
- 805 56. Davie, J.R. Nuclear matrix, dynamic histone acetylation and transcriptionally active  
806 chromatin. *Mol Biol Rep* **24**, 197-207 (1997).
- 807 57. Marasca, F. *et al.* LINE1 are spliced in non-canonical transcript variants to regulate T  
808 cell quiescence and exhaustion. *Nat Genet* **54**, 180-193 (2022).
- 809 58. Liu, N. *et al.* Selective silencing of euchromatic L1s revealed by genome-wide  
810 screens for L1 regulators. *Nature* **553**, 228-232 (2018).
- 811 59. Jachowicz, J.W. *et al.* LINE-1 activation after fertilization regulates global chromatin  
812 accessibility in the early mouse embryo. *Nat Genet* **49**, 1502-1510 (2017).
- 813 60. Reis, E.M., Louro, R., Nakaya, H.I. & Verjovski-Almeida, S. As antisense RNA gets  
814 intronic. *OMICS* **9**, 2-12 (2005).
- 815 61. Faghihi, M.A. & Wahlestedt, C. Regulatory roles of natural antisense transcripts. *Nat*  
816 *Rev Mol Cell Biol* **10**, 637-643 (2009).
- 817 62. Reis, R.S. & Poirier, Y. Making sense of the natural antisense transcript puzzle.  
818 *Trends Plant Sci* **26**, 1104-1115 (2021).
- 819 63. Gallego-Irardi, M.C. *et al.* N-terminal sequences in matrin 3 mediate phase separation  
820 into droplet-like structures that recruit TDP43 variants lacking RNA binding  
821 elements. *Lab Invest* **99**, 1030-1040 (2019).
- 822 64. Rippe, K. Liquid-Liquid Phase Separation in Chromatin. *Cold Spring Harb Perspect*  
823 *Biol* **14** (2022).
- 824 65. Lafontaine, D.L.J., Riback, J.A., Bascetin, R. & Brangwynne, C.P. The nucleolus as a  
825 multiphase liquid condensate. *Nat Rev Mol Cell Biol* **22**, 165-182 (2021).
- 826 66. van Bruggen, R. *et al.* MATR3 F115C knock-in mice do not exhibit motor defects or  
827 neuropathological features of ALS. *Biochem Biophys Res Commun* **568**, 48-54  
828 (2021).
- 829 67. Zhang, Y.J. *et al.* Heterochromatin anomalies and double-stranded RNA  
830 accumulation underlie C9orf72 poly(PR) toxicity. *Science* **363** (2019).
- 831 68. Krug, L. *et al.* Retrotransposon activation contributes to neurodegeneration in a  
832 *Drosophila* TDP-43 model of ALS. *PLoS Genet* **13**, e1006635 (2017).
- 833 69. Biscotti, M.A., Canapa, A., Forconi, M., Olmo, E. & Barucca, M. Transcription of  
834 tandemly repetitive DNA: functional roles. *Chromosome Res* **23**, 463-477 (2015).
- 835 70. Malik, A.M. *et al.* Matrin 3-dependent neurotoxicity is modified by nucleic acid  
836 binding and nucleocytoplasmic localization. *Elife* **7** (2018).
- 837 71. Li, P. *et al.* Germline competent embryonic stem cells derived from rat blastocysts.  
838 *Cell* **135**, 1299-1310 (2008).
- 839 72. Nakao, H. *et al.* A possible aid in targeted insertion of large DNA elements by  
840 CRISPR/Cas in mouse zygotes. *Genesis* **54**, 65-77 (2016).
- 841 73. Wen, B. *et al.* Overlapping euchromatin/heterochromatin-associated marks are  
842 enriched in imprinted gene regions and predict allele-specific modification. *Genome*  
843 *Res* **18**, 1806-1813 (2008).

- 844 74. Buenrostro, J.D., Wu, B., Chang, H.Y. & Greenleaf, W.J. ATAC-seq: A Method for  
845 Assaying Chromatin Accessibility Genome-Wide. *Curr Protoc Mol Biol* **109**, 21 29  
846 21-21 29 29 (2015).
- 847 75. Rinn, J.L. *et al.* Functional demarcation of active and silent chromatin domains in  
848 human HOX loci by noncoding RNAs. *Cell* **129**, 1311-1323 (2007).
- 849 76. Lehnertz, B. *et al.* Suv39h-mediated histone H3 lysine 9 methylation directs DNA  
850 methylation to major satellite repeats at pericentric heterochromatin. *Curr Biol* **13**,  
851 1192-1200 (2003).
- 852 77. Vassetzky, N.S., Ten, O.A. & Kramerov, D.A. B1 and related SINEs in mammalian  
853 genomes. *Gene* **319**, 149-160 (2003).
- 854 78. Rao, S.S. *et al.* A 3D map of the human genome at kilobase resolution reveals  
855 principles of chromatin looping. *Cell* **159**, 1665-1680 (2014).
- 856 79. Martin, M. Cutadapt Removes Adapter Sequences From High-Throughput  
857 Sequencing Reads. *EMBnet.journal* **17** (2011).
- 858 80. Langmead, B., Trapnell, C., Pop, M. & Salzberg, S.L. Ultrafast and memory-efficient  
859 alignment of short DNA sequences to the human genome. *Genome Biol* **10**, R25  
860 (2009).
- 861 81. Quinlan, A.R. & Hall, I.M. BEDTools: a flexible suite of utilities for comparing  
862 genomic features. *Bioinformatics* **26**, 841-842 (2010).
- 863 82. Robinson, J.T. *et al.* Integrative genomics viewer. *Nat Biotechnol* **29**, 24-26 (2011).
- 864 83. Thorvaldsdottir, H., Robinson, J.T. & Mesirov, J.P. Integrative Genomics Viewer  
865 (IGV): high-performance genomics data visualization and exploration. *Brief*  
866 *Bioinform* **14**, 178-192 (2013).
- 867 84. Zang, C. *et al.* A clustering approach for identification of enriched domains from  
868 histone modification ChIP-Seq data. *Bioinformatics* **25**, 1952-1958 (2009).
- 869 85. Kim, D., Paggi, J.M., Park, C., Bennett, C. & Salzberg, S.L. Graph-based genome  
870 alignment and genotyping with HISAT2 and HISAT-genotype. *Nat Biotechnol* **37**,  
871 907-915 (2019).
- 872 86. Zhang, Y. *et al.* Model-based analysis of ChIP-Seq (MACS). *Genome Biol* **9**, R137  
873 (2008).
- 874 87. Anders, S., Pyl, P.T. & Huber, W. HTSeq--a Python framework to work with high-  
875 throughput sequencing data. *Bioinformatics* **31**, 166-169 (2015).
- 876 88. Servant, N. *et al.* HiC-Pro: an optimized and flexible pipeline for Hi-C data  
877 processing. *Genome Biol* **16**, 259 (2015).
- 878 89. Ramirez, F. *et al.* High-resolution TADs reveal DNA sequences underlying genome  
879 organization in flies. *Nat Commun* **9**, 189 (2018).
- 880 90. Lieberman-Aiden, E. *et al.* Comprehensive mapping of long-range interactions  
881 reveals folding principles of the human genome. *Science* **326**, 289-293 (2009).
- 882 91. Crane, E. *et al.* Condensin-driven remodelling of X chromosome topology during  
883 dosage compensation. *Nature* **523**, 240-244 (2015).
- 884 92. Pertea, M. *et al.* StringTie enables improved reconstruction of a transcriptome from  
885 RNA-seq reads. *Nat Biotechnol* **33**, 290-295 (2015).

886 93. Love, M.I., Huber, W. & Anders, S. Moderated estimation of fold change and  
887 dispersion for RNA-seq data with DESeq2. *Genome Biol* **15**, 550 (2014).  
888

## 889 **Acknowledgments**

890 We thank members of the Wen lab for their support and suggestions. We thank Yalin Huang  
891 and Jin Li for assistance with fluorescence microscopy. This work was supported by the  
892 National Natural Science Foundation of China (32130019 to B.W.) and the National Key  
893 Research and Development Program of China (2021YFA1100203 to B.W.).

## 894 **Author Contributions**

895 Y.Z. and B.W. conceived and designed this study. Y.Z. performed most of the experiments  
896 except for RIP assay (by Z.G) and Hi-C library preparation (Q.W.). X.C. and X.M. performed  
897 all bioinformatics analyses, supervised by G.W. X.C, Y.Z. and Z.Z. provided some  
898 experimental supports. Y.Z., X.C. and B.W. prepared the manuscript with input of all authors.

## 899 **Competing Interests**

900 The authors declare no competing interests.

901

**Fig.1**

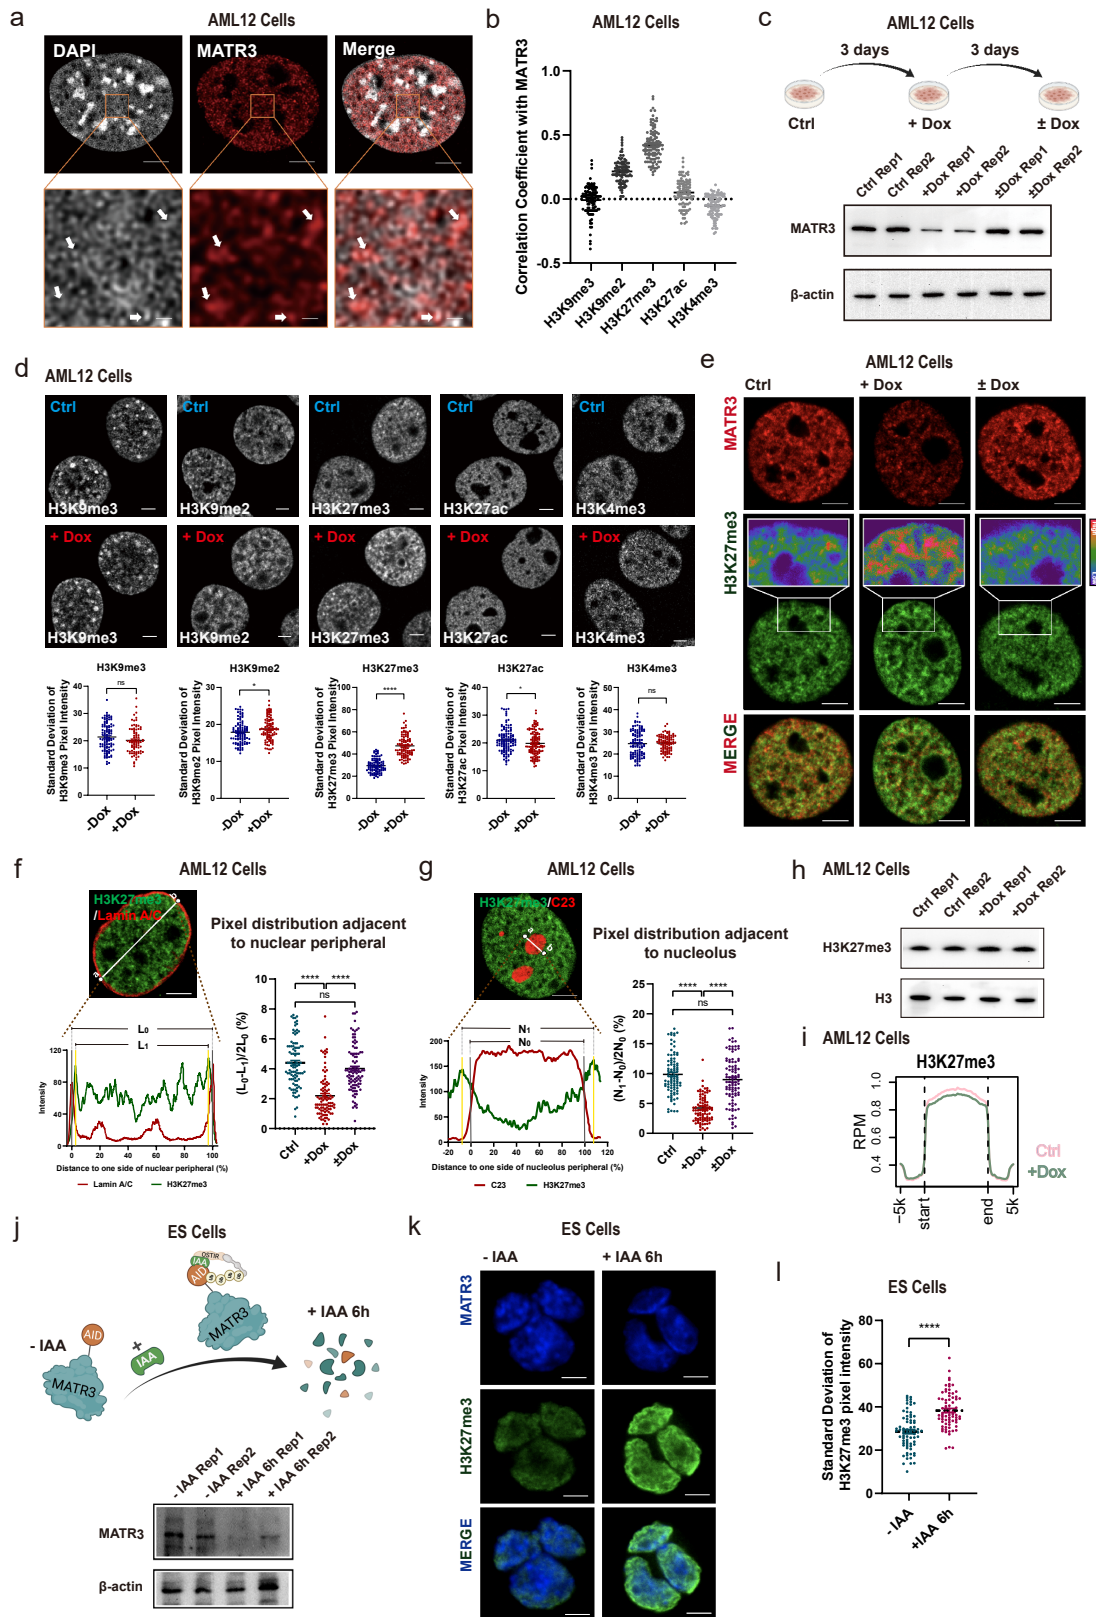

902

903

**Fig. 1: MATR3 regulates the spatial organization of chromatin.**



904 **a**, Super-resolution fluorescence microscopy images showing relative distribution between  
905 MATR3 and DAPI. **b**, Coefficient of correlation between MATR3 and histone modification  
906 H3K9me3 (n=105), H3K9me2 (n=98), H3K27me3 (n=107), H3K27ac (n=97) and H3K4me3  
907 (n=99) in AML12 cells. Quantifications were performed on randomly selected ROIs in cell nuclei.  
908 Also see **Extended Data Fig.1b**. Each point represents one cell. **c**, (upper) Schematic diagram of  
909 dox-inducible shRNA system for MATR3 knockdown and MATR3 rescue in AML12 cells.  
910 (lower) Western blotting detected the expression level of MATR3 after 3 days of Dox treatment  
911 (+Dox) and followed by 3 days of Dox removal ( $\pm$ Dox) in AML12 cells. Rep, replicate. **d**, (upper)  
912 Representative cross-section images showing distribution of histone modifications upon Ctrl and  
913 MATR3 knock down (+Dox). (lower) Quantify the distribution pattern of histone modifications  
914 by Standard Deviation of Pixel Intensity in cell nuclei. For H3K9me3, n=102 (Ctrl) or 84 (+Dox);  
915 for H3K9me2, n=100 (Ctrl) or 101 (+Dox); for H3K27me3, n=98 (Ctrl) or 98 (+Dox); for  
916 H3K27ac, n=117 (Ctrl) or 124 (+Dox); for H3K27me3, n=98 (Ctrl) or 98 (+Dox); for H3K4me3,  
917 n=107 (Ctrl) or 97 (+Dox). Each point represents one cell. **e**, Representative cross-section images  
918 showing nuclear localization of MATR3 and H3K27me3 upon Ctrl, MATR3 knock down (+Dox)  
919 and MATR3 rescue ( $\pm$ Dox). **f**, Relative distribution of H3K27me3 and Lamin A/C. L<sub>0</sub>, region  
920 between nuclear membrane (position of nuclear membrane was determined by the X-axis of the  
921 Lamin A/C pixel peaks on both sides). L<sub>1</sub>, region between two H3K27me3 pixel peaks that closest  
922 to the nuclear membrane. Quantify changes of H3K27me3 distribution adjacent to nuclear  
923 peripheral in Ctrl (n=95), MATR3 knockdown (+Dox) (n=92) and MATR3 rescue ( $\pm$ Dox) (n=98)  
924 cells by formula of  $(L_0-L_1)/2L_0$  (%). **g**, Relative distribution of H3K27me3 and C23. N<sub>0</sub>, region  
925 between nucleolus membrane (position of nucleolus membrane was determined by the X-axis of  
926 the half-peaks on both sides). N<sub>1</sub>, region between two H3K27me3 pixel peaks that are closest to  
927 the nucleolus membrane. Quantify changes of H3K27me3 distribution adjacent to nucleolus in  
928 Ctrl (n=91), MATR3 knock down (n=91) and MATR3 rescue (n=92) cells by formula of  $(N_1-$   
929  $N_0)/2N_0$  (%). **h**, H3K27me3 modification level upon Ctrl and MATR3 knockdown (+Dox) as  
930 detected by western blotting. Rep, replication. **i**, Average enrichment of H3K27me3 in Ctrl and  
931 shMatr3 at peaks regions (ChIP-seq). **j**, (upper) Schematic diagram of IAA-inducible rapid protein  
932 degradation system for MATR3 in ES cells. (lower) Western blotting detection of the efficiency of  
933 MATR3 knockdown in ES cells after 6h addition of 500 $\mu$ M IAA or equal-volume of alcohol (-  
934 IAA). Rep, replication. **k**, Representative cross-section images showing nuclear localization of  
935 H3K27me3 in ES cells after 6h addition of 500 $\mu$ M IAA (+IAA 6h) or equal-volume of alcohol (-  
936 IAA). **l**, Standard deviation of H3K27me3 pixel intensity after 6h addition of 500 $\mu$ M IAA (+IAA  
937 6h) (n=74) or equal-volume of alcohol (-IAA) (n=74). The P values were calculated using

938 unpaired two-tailed Student's t test; ns, not significant, \* $p < 0.05$ , \*\*\*\* $p < 0.0001$ . Error bars  
939 indicate mean  $\pm$  s.e.m. Scale bars, 5 $\mu$ m (**a** (upper), **e-g** and **k**) or 0.5 $\mu$ m (**a** (lower)).  
940



943 **a**, Western blotting showing the distribution of MATR3 proteins in chromatin-non-associated and  
944 chromatin-associated extracts before and after DRB (75 $\mu$ M for 12h) or RNase A (pre-treat with  
945 0.05% Triton x-100 for 30s, followed by 10 $\mu$ g/ml RNase A for 1h) treatment in AML12 cells.  
946 Representative of two independent replicates with similar results. **b**, (Left) The representative  
947 cross-section image showing nuclear distribution of DAPI, MATR3 and H3K27me3 before and  
948 after 24h treating of 75 $\mu$ M DRB in AML12 cells. (Right) Line charts showing pixel intensity of  
949 each channel on the ROIs. *r*, coefficient of correlation. **c**, Genomic distribution of all MATR3  
950 RIP-seq peaks in AML12 cells. **d**, The number of MATR3 RIP-seq peaks in repetitive elements  
951 (REs) in AML12 cells. **e**, Heatmap of MATR3 RIP-seq sense and antisense median reads count in  
952 repetitive elements in AML12 cells. All RE copies with the RIP (MATR3 -IgG) count number  $\geq$   
953 10 are kept. Median reads counts are measured for all copies of that RE family. **f**, Heatmap of  
954 RIP-seq antisense and sense mean reads count for MATR3 associated L1 subfamilies. L1  
955 subfamilies are considered as MATR3 associated if the subfamily contains more than 50 copies.  
956 The copies with RIP (MATR3 -IgG) count number  $\geq$  10 are kept. L1 RNAs are ranked by  
957 antisense mean reads count. **g**, (Left) Representative cross-section images showing relative  
958 distribution between AS L1 RNA with MATR3 and with histone modification marks (H3K27me3,  
959 H3K9me3 and H3K27ac) in AML12 cells. Probes for RNA FISH were designed towards the  
960 consensus sequence of antisense L1\_Mus1 RNAs. (Right) Line charts showing pixel intensity of  
961 each channel on the ROIs. **h**, Normalized average density of the marks (top) and  
962 heatmaps(bottom) for the two groups of L1 loci that AS L1 RNA or L1 RNA interacted with  
963 MATR3. L1 loci with RIP (MATR3 -IgG) count number  $\geq$  10 of antisense RNA were identified  
964 as MATR3-associated antisense L1, and the same cutoff for MATR3-associated sense L1. *r*,  
965 coefficient of correlation. Scale bars, 5 $\mu$ m (**b**, **g**).  
966

Fig.3

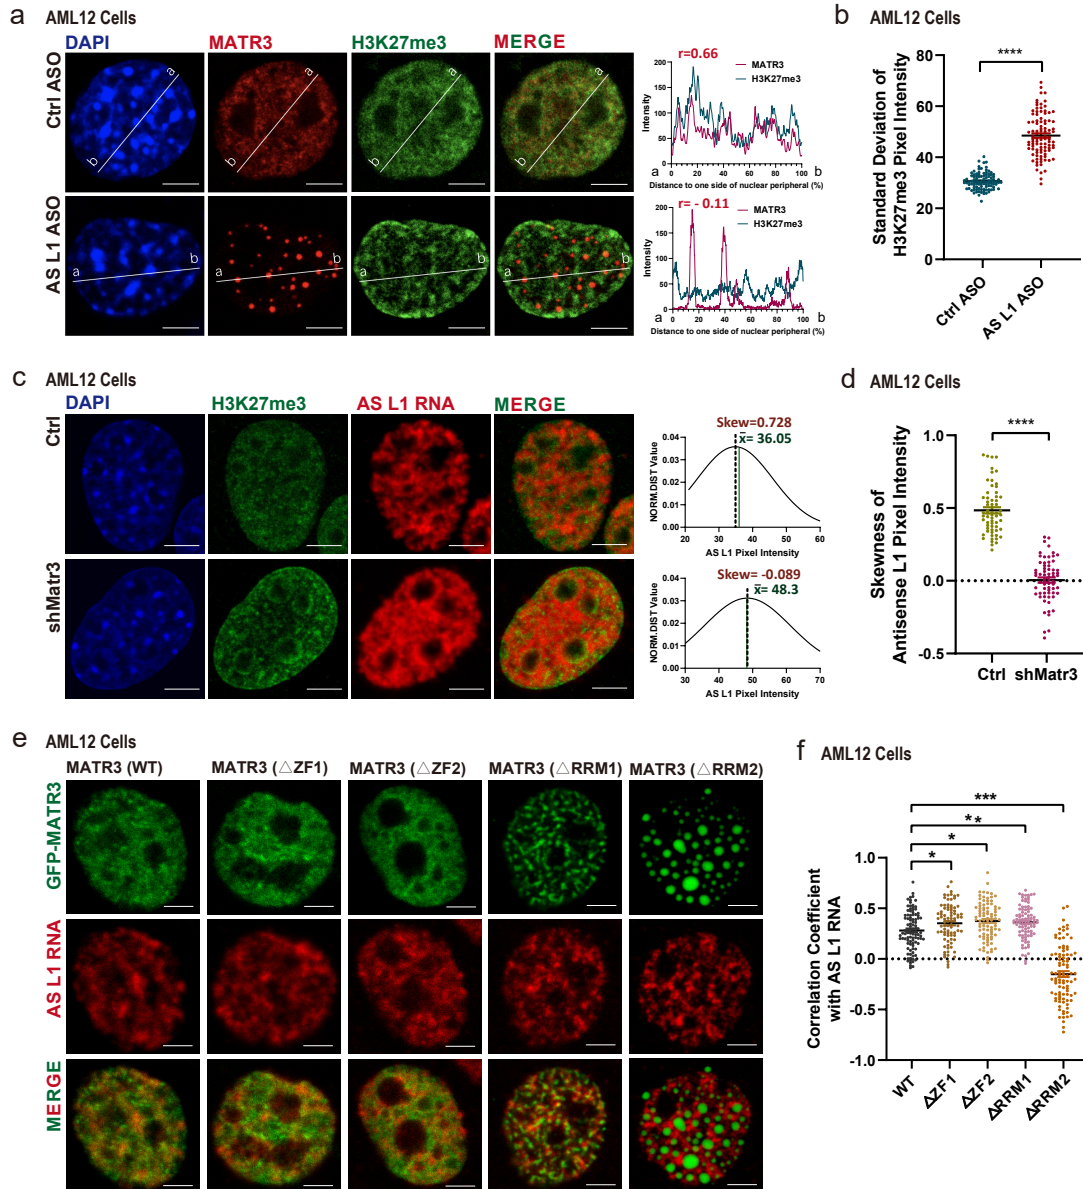

967

968

**Fig. 3: MATR3 cooperates with AS L1 RNA in chromatin organization.**

969

**a**, (Left) The representative cross-section image showing nuclear distribution of MATR3 and

970

H3K27me3 before and after 12h treating with antisense L1 ASOs in AML12 cells. (Right) Line

971

charts showing pixel intensity of each channel on the ROIs. *r*, coefficient of correlation. **b**,

972

Standard deviation of H3K27me3 pixel intensity before (*n*=98) and after (*n*=97) 12h treating with

973

antisense L1 ASOs in AML12 cells. **c**, (left) The representative cross-section image showing

974

nuclear distribution of H3K27me3 and AS L1 RNA before and after MATR3 knockdown (Dox

975

treatment for 3d) in AML12 cells. (right) The normal distribution curve for the AS L1 pixel

976

intensity. **d**, Skewness of antisense L1 RNA pixel intensity in Ctrl (*n*=63) and shMatr3 cells

977

(*n*=66). **e**, Representative images showing nuclear colocalization of AS L1 RNAs with wild-type

978 and truncated GFP-MATR3 proteins in AML12 cells. **f**, Coefficient of correlation between AS L1  
979 RNA with wild-type and truncated GFP-MATR3 proteins. WT (n=98),  $\Delta$ ZF1 (n=83),  $\Delta$ ZF2  
980 (n=89),  $\Delta$ RRM1 (n=91),  $\Delta$ RRM2 (n=94). The P values were calculated using unpaired two-  
981 tailed Student's t test; ns, not significant, \* $p < 0.05$ , \*\*\*\* $p < 0.0001$ . Error bars indicate mean  $\pm$   
982 s.e.m. Scale bars, 5 $\mu$ m (**a**, **c**, **e**).  
983

Fig.4

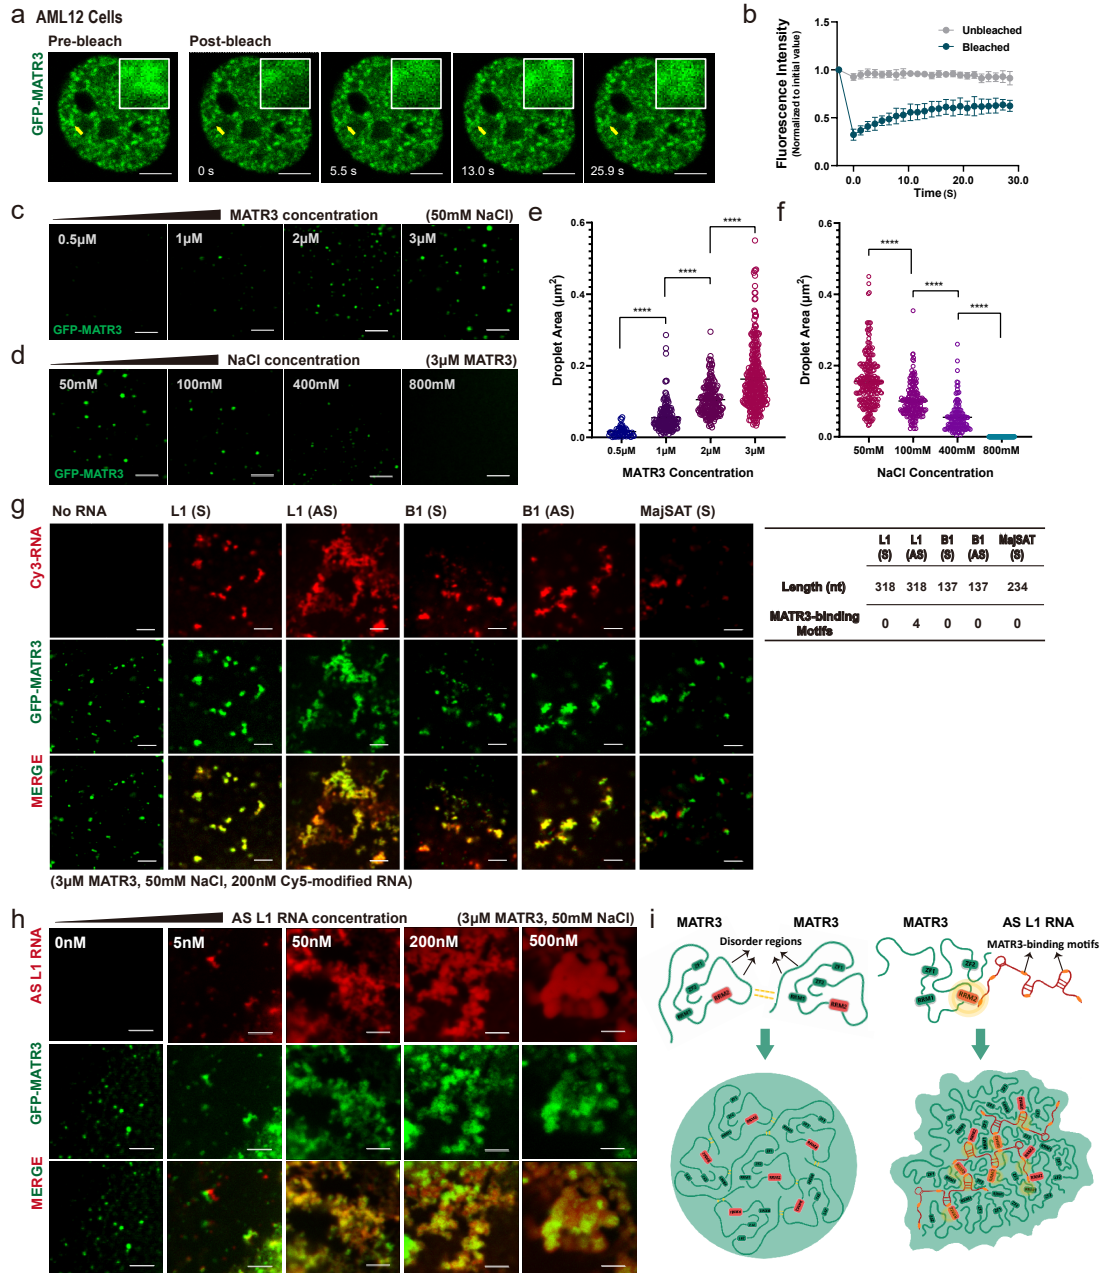

984

985 **Fig. 4: AS L1 RNAs facilitate meshwork-like organization of MATR3 proteins.**

986 **a**, Representative images of the GFP-MATR3 FRAP experiments in AML2 cells. Solid arrows

987 indicate the bleached points. **b**, The fluorescence recovery curve of the GFP-MATR3 FRAP

988 experiments. Data are expressed as the mean  $\pm$  s.e.m. (n = 9). **c**, Representative images of droplet

989 formation assays with different concentrations of GFP-MATR3 proteins. NaCl concentration,

990 50mM. **d**, Representative images of droplet formation assays with different NaCl concentrations.

991 GFP-MATR3 protein concentration, 3  $\mu$ M. **e**, Areas of MATR3 protein droplets formed in

992 different protein concentration (3  $\mu$ M: n = 315; 2  $\mu$ M: n = 196; 1  $\mu$ M: n = 165; 0.5  $\mu$ M: n = 50). **f**,

993 Areas of MATR3 protein droplets formed in different NaCl concentration (50 mM: n = 248; 100

994 mM: n = 196; 400 mM: n = 127; 800 mM: none). **g**, (left) Representative images of droplet  
995 formation assays by GFP-MATR3 with different *in-vitro*-transcribed RNAs (Sense L1, Antisense  
996 L1, Sense B1, Antisense B1). RNA concentration, 200nM. GFP-MATR3 protein concentration, 3  
997  $\mu$ M. NaCl concentration, 50mM. (right) The table showing the nucleotide number and the number  
998 of MATR3-binding motifs on the *in-vitro*-transcribed RNAs. **h**, Representative images of droplet  
999 formation assays by GFP-MATR3 with different concentration (0nM, 5nM, 50nM, 200nM,  
1000 500nM) of AS L1 RNAs. GFP-MATR3 protein concentration, 3  $\mu$ M. NaCl concentration, 50mM.  
1001 **i**, Schematic representation for MATR3-MATR3 droplets formation and MATR3-AS L1 RNA  
1002 meshwork formation. The P values were calculated using unpaired two-tailed Student's t test;  
1003 \*\*\*\* $p < 0.0001$ . Scale bars, 5 $\mu$ m (**a**, **c**, **d**, **g**, **h**).  
1004



**Fig.5**

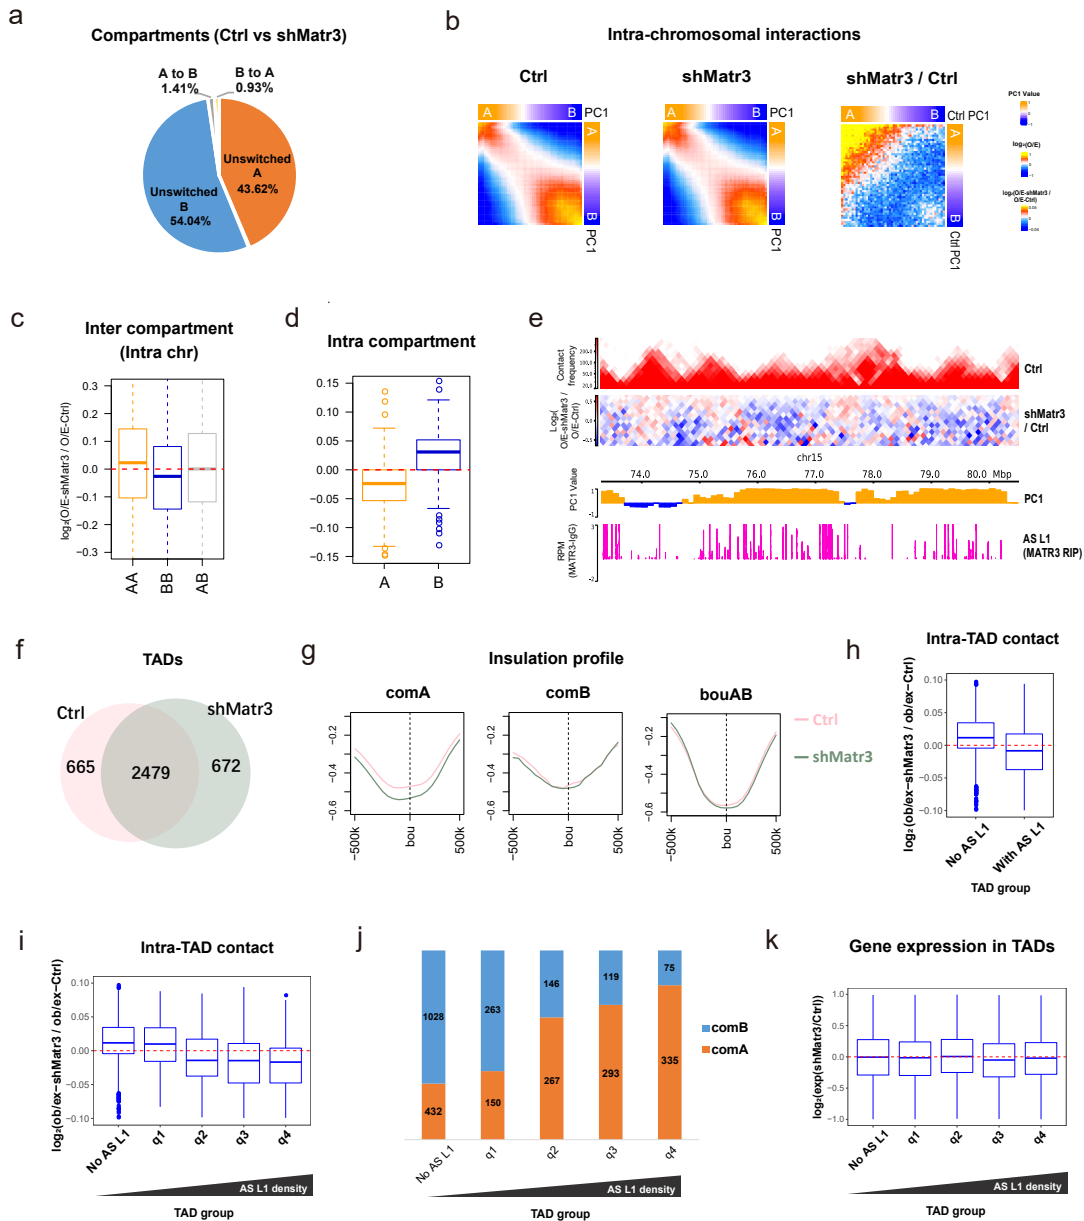

1005

1006

**Fig. 5: 3D genome organization changes on compartments and TADs upon MATR3**

1007

**depletion.**

1008

**a**, Percentages of compartment status at unswitched A, unswitched B, B switched to A and A

1009

switched to B between Ctrl and shMatr3. **b**, Average contact enrichment between pairs of 100kb

1010

loci in Ctrl, shMatr3 and the comparison between them. All the 100kb loci are arranged by Ctrl

1011

PC1 values in decreasing order and divided into 50 quantiles. Average enrichment of PC1 values

1012

are calculated for each quantile. **c**, Changes in contacts between compartment regions from the

1013

same (AA or BB) and different (AB) type in Ctrl and shMatr3. Data are represented as boxplots

1014

based on  $\log_2(\text{O/E-shMatr3} / \text{O/E-Ctrl})$  values per pair. **d**, Changes in contacts within A or B

1015

compartment regions between Ctrl and shMatr3. Data are represented as boxplots based on

1016  $\log_2(\text{O/E-shMatr3} / \text{O/E-Ctrl})$  values per compartment region. **e**, Snapshot of an example region,  
1017 showing Hi-C, AS L1 in MATR3 RIP-seq in Ctrl and Hi-C changes between Ctrl and shMatr3  
1018 samples, using HiCEXplorer. The values on the y-axis for Hi-C contact and O/E heatmap are iced  
1019 normalized read counts at 100kb resolution. The values on the y-axis for RIP-seq are average  
1020 reads per million of mapped reads (RPM). **f**, Venn diagram shows the common and sample  
1021 specific TADs between Ctrl and shMatr3 samples. The TADs that overlapped length / TAD  
1022 length > 0.8 both in Ctrl and shMatr3 samples were identified as common TADs. **g**, Insulation  
1023 strength at boundaries of TAD boundaries in compartment A, B and AB boundaries. **h**, Intra-TAD  
1024 contacts changes of TADs associated with MATR3-AS L1 RNAs TADs and non-associated TADs  
1025 according to density of anti-MATR3 RIP-seq signal of AS L1 RNAs. **i**, Intra-TAD contacts  
1026 changes of TADs non-associated with MATR3-AS L1 RNAs and four quantile groups associated  
1027 with MATR3-AS L1 RNAs ranking by increasing in MATR3-AS L1 RNAs density. **j**, Percentage  
1028 of TADs located in compartment A or B regions from five TAD groups (same groups in **i**). **k**,  
1029 Boxplot shows gene expression changes for TAD groups from **i**.  
1030

Fig.6

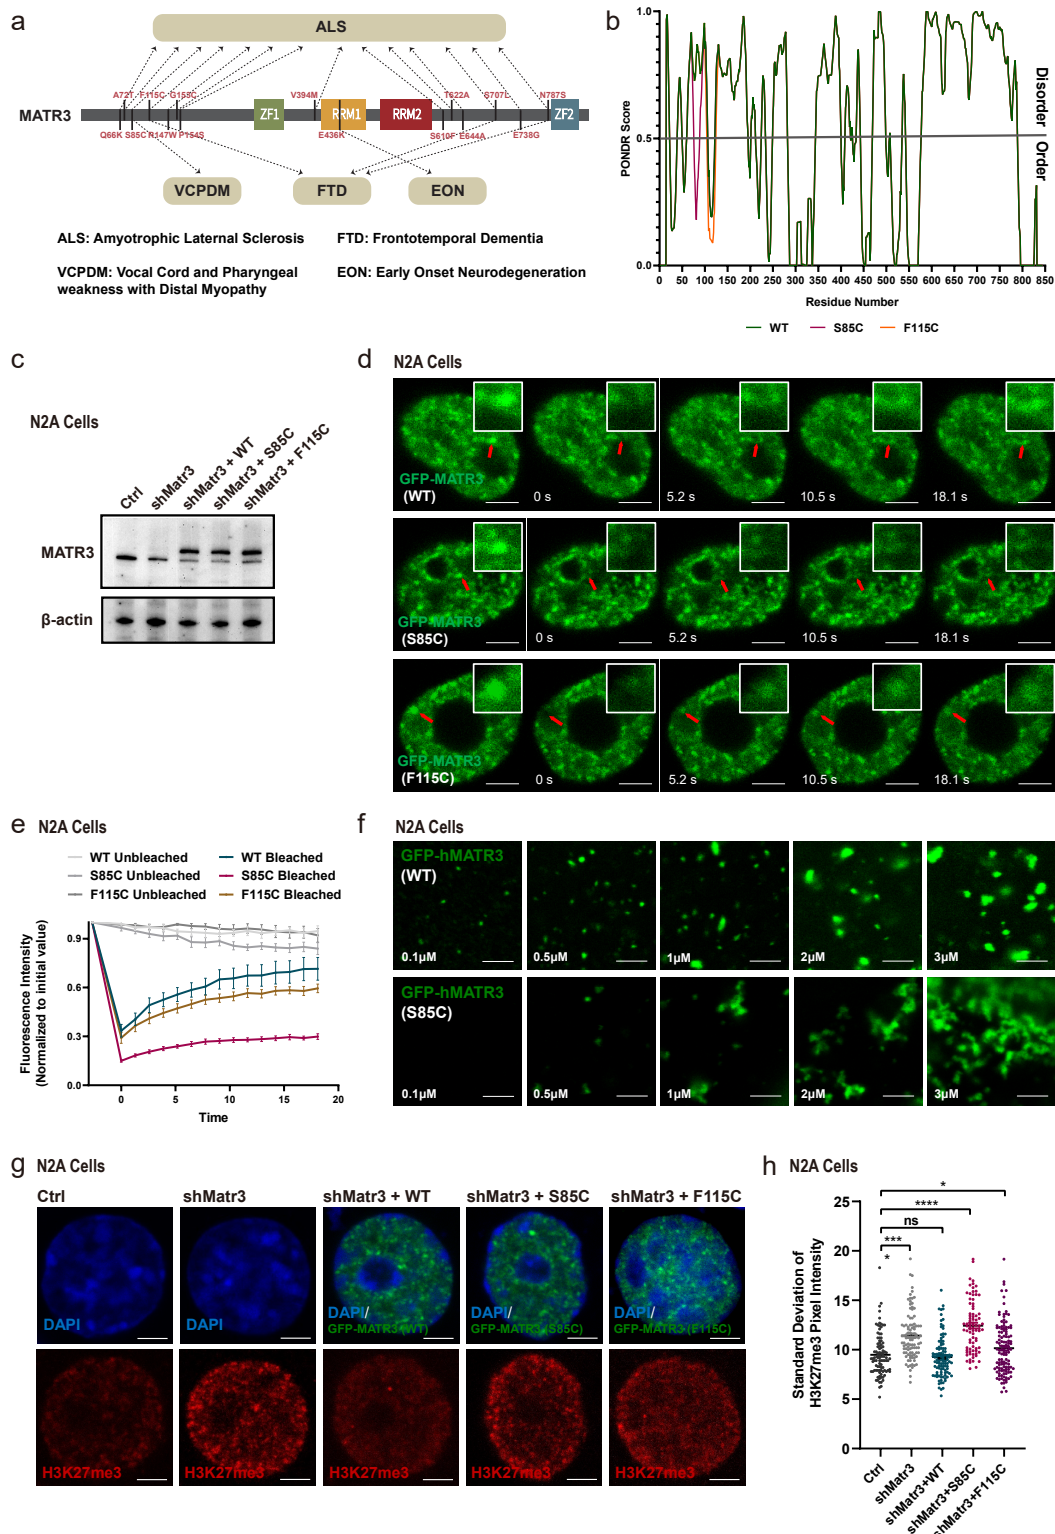

1031

1032 **Fig. 6: ALS associated mutants lead to reorganization of nuclear chromatin in N2A cells.**

1033 **a**, Schematic diagram of degenerative-disease-associated mutations on MATR3 protein. **b**, The  
 1034 order/disorder regions of MATR3 (WT/S85C/F115C) protein predicted by the PONDRA algorithm.

1035 **c**, MATR3 knockdown and GFP-tagged WT/S85C/F115C MATR3 protein replacement in N2A

1036 cells. The efficiency of endogenous MATR3 knockdown and exogenous GFP-MATR3  
1037 (WT/S85C/F115C) over-expression as detected by western blotting. Representative of two  
1038 independent replicates with similar results. **d**, Representative images of the GFP-MATR3  
1039 (WT/S85C/F115C) FRAP experiments. Solid arrows point to the bleached points. **e**, The  
1040 fluorescence recovery curve of the GFP-MATR3 (WT/S85C/F115C) FRAP experiments. Data are  
1041 expressed as the mean  $\pm$  s.e.m. (n = 9). **f**, Representative images of droplet formation assays with  
1042 different concentrations of GFP-hMATR3 (WT/S85C) proteins. NaCl concentration, 50mM. Scale  
1043 bars, 3  $\mu$ m. **g**, Representative cross-section images showing nuclear localization of H3K27me3  
1044 upon Ctrl, MATR3 knockdown and exogenous MATR3 (WT/S85C/F115C) overexpression in  
1045 N2A cells. Scale bars, 5 $\mu$ m. **h**, Standard deviation of H3K27me3 pixel intensity upon Ctrl (n=93),  
1046 MATR3 knock down (n=100), GFP-MATR3 (WT) rescue (n=104), GFP-MATR3 (S85C) rescue  
1047 (n=82) and GFP-MATR3 (F115C) rescue (n=120). The P values were calculated using unpaired  
1048 two-tailed Student's t test; ns, not significant, \*p<0.05, \*\*\*\*p<0.0001. Error bars indicate mean  $\pm$   
1049 s.e.m. Scale bars, 3 $\mu$ m (**f**) or 5 $\mu$ m (**d**, **g**).  
1050

Fig.7

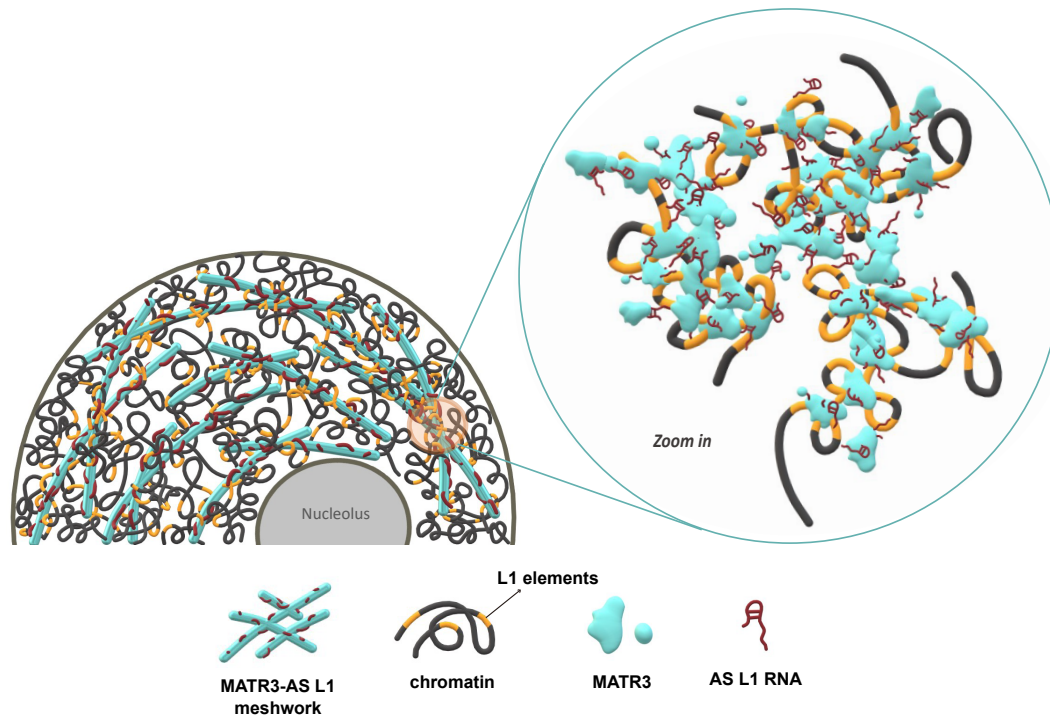

1051

1052 **Fig. 7: A model on how MATR3-AS L1 RNA meshwork organizes the 3D Structure of**  
1053 **chromatin**

1054 The meshwork formed by MATR3 proteins and AS L1 RNAs functions as the nuclear  
1055 scaffold for chromatin which highly transcribed MATR3-associated AS L1 RNAs (Left). The  
1056 zoom-in view: the newly transcribed AS L1 RNAs *in-cis* interact with L1 loci, attracting MATR3  
1057 proteins to form a gel-like meshwork, further gathering nearby chromatin (Right).

1058

## Extended Data Fig.1

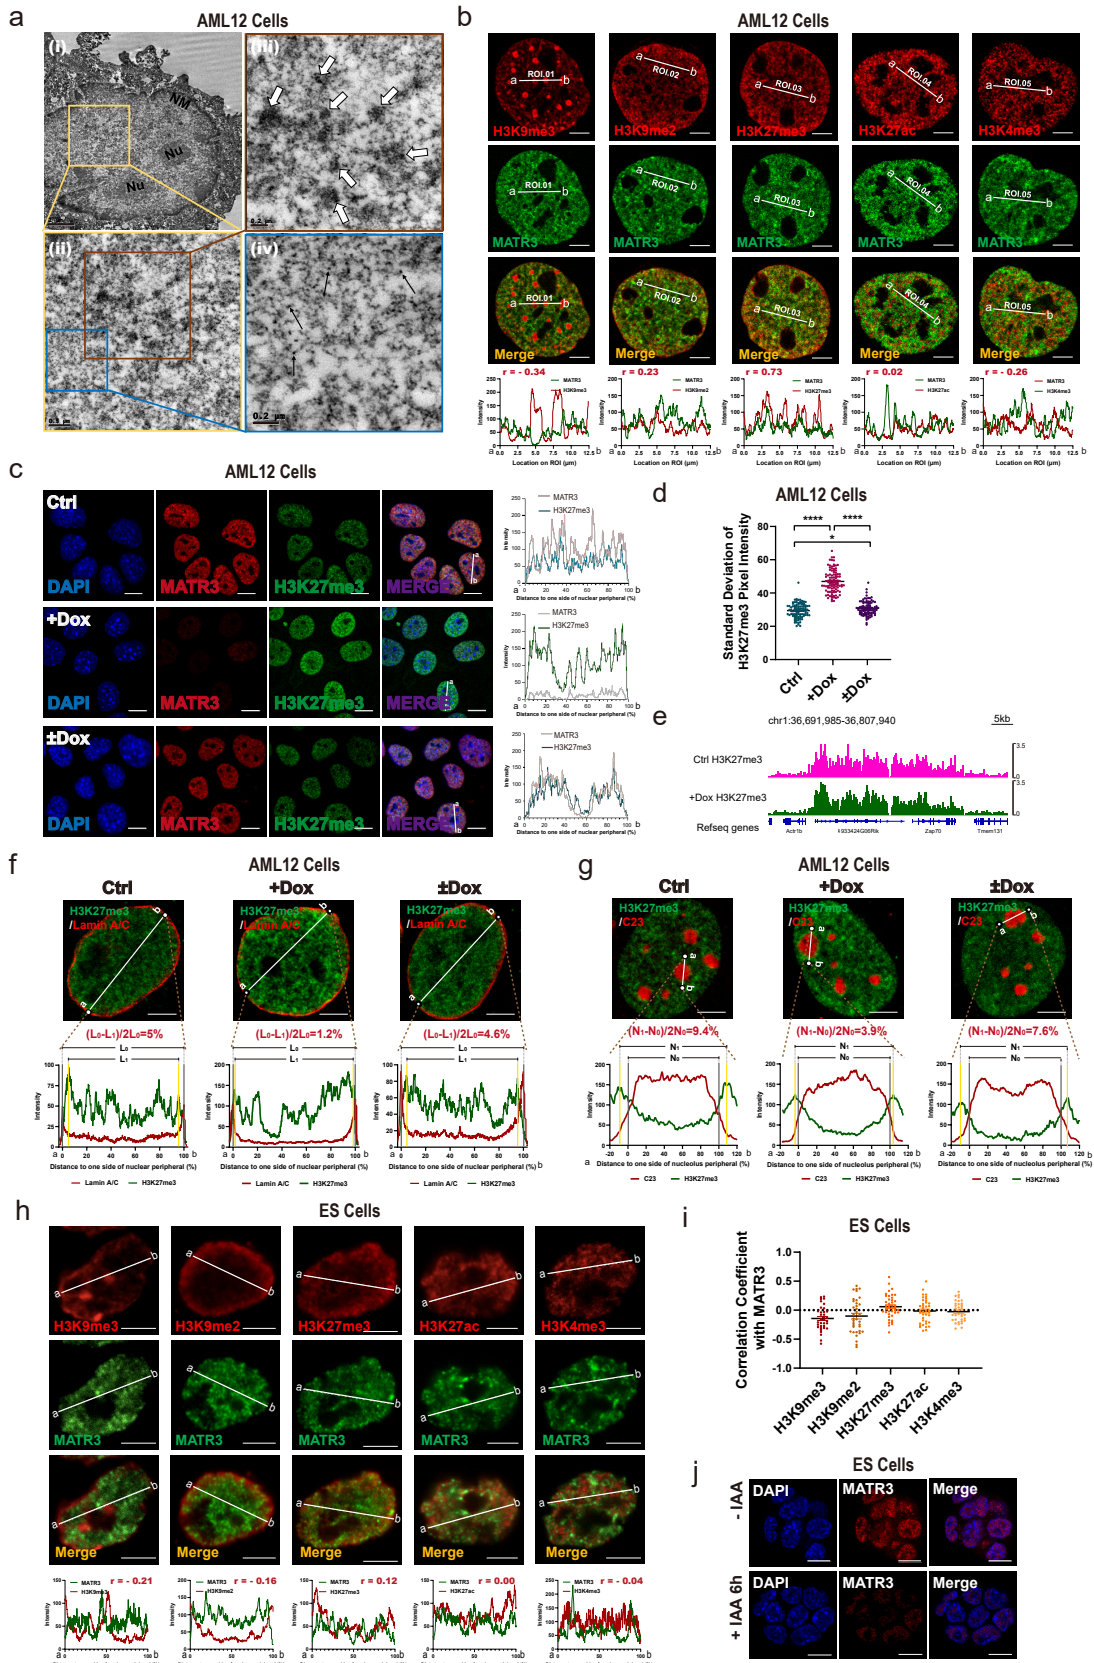

1059

1060

Extended Data Fig. 1 MATR3 modulates redistribution of chromatin in nuclei.

1061 **a**, Immuno-electron microscopy analysis of MATR3 protein distribution labeled by DAB in the  
1062 AML12 cell. The solid arrows point to the individual DAB signal and the hollow arrows point to  
1063 the clustered DAB signals, both of which represent MATR3 proteins. NM, nuclear membrane;  
1064 Nu, nucleolus. Scale bars, (i): 2 $\mu$ m; (ii): 0.5 $\mu$ m; (iii), (iv): 0.2 $\mu$ m. **b**, (Upper) Super-resolution  
1065 fluorescence microscopy images showing relative distribution between MATR3 and histone  
1066 modifications (H3K9me3, H3K9me2, H3K27me3, H3K27ac and H3K4me3) in AML12 cells.  
1067 (Lower) Line charts showing pixel intensity of each channel on the regions of interest (ROI). *r*,  
1068 coefficient of correlation. **c**, (Left) Representative cross-section images showing nuclear  
1069 localization of MATR3 and H3K27me3 upon Ctrl, MATR3 knockdown (+Dox) and MATR3  
1070 rescue ( $\pm$ Dox). (Right) Line charts showing pixel intensity of each channel on the ROIs. **d**,  
1071 Standard deviation of H3K27me3 pixel intensity of Ctrl (n=98), MATR3 knockdown (+Dox)  
1072 (n=100) and MATR3 rescue ( $\pm$ Dox) (n=94). **e**, Genome browser of the H3K27me3 enriched  
1073 region in Ctrl and MATR3 knockdown (+Dox) samples. **f**, Pixel intensity of ROIs showing  
1074 relative distribution of H3K27me3 and Lamin A/C upon Ctrl, MATR3 knockdown (+Dox) and  
1075 MATR3 rescue ( $\pm$ Dox). L<sub>0</sub>, region between nuclear membrane. L<sub>1</sub>, region between two  
1076 H3K27me3 pixel peaks that closest to the nuclear membrane. Scale bars, 5 $\mu$ m. **g**, Pixel intensity  
1077 of ROIs showing relative distribution of H3K27me3 and C23. N<sub>0</sub>, region between nucleolus  
1078 membrane (position of nucleolus membrane on X-axis determined by C23 pixel half-peaks on  
1079 both sides). N<sub>1</sub>, region between two H3K27me3 pixel peaks that closest to the nucleolus  
1080 membrane. **h**, (Upper) Representative cross-section images showing relative distribution between  
1081 MATR3 and histone modifications (H3K9me3, H3K9me2, H3K27me3, H3K27ac and H3K4me3)  
1082 in ES cells. (Lower) Line charts showing pixel intensity of each channel on the regions of interest  
1083 (ROI). *r*, coefficient of correlation. **i**, Coefficient of correlation between MATR3 and histone  
1084 modification H3K9me3 (n=35), H3K9me2 (n=36), H3K27me3 (n=40), H3K27ac (n=40) and  
1085 H3K4me3 (n=36) in ES cells. Quantifications were performed on randomly selected ROIs in cell  
1086 nuclei. Each point represents one cell. **j**, Immunofluorescent detection of the efficiency of MATR3  
1087 knockdown in ES cells after 6h addition of 500 $\mu$ M IAA or equal-volume of alcohol (-IAA).  
1088 The P values were calculated using unpaired two-tailed Student's t test; \*p<0.05, \*\*\*\*p<0.0001.  
1089 Error bars indicate mean  $\pm$  s.e.m. Scale bars, 0.2 $\mu$ m (**a** (iii, iv)), 0.5 $\mu$ m (**a** (ii)), 2 $\mu$ m (**a** (i)), 5 $\mu$ m  
1090 (**b**, **f**, **g**, **h**) or 10 $\mu$ m (**c**, **j**).  
1091

## Extended Data Fig.2

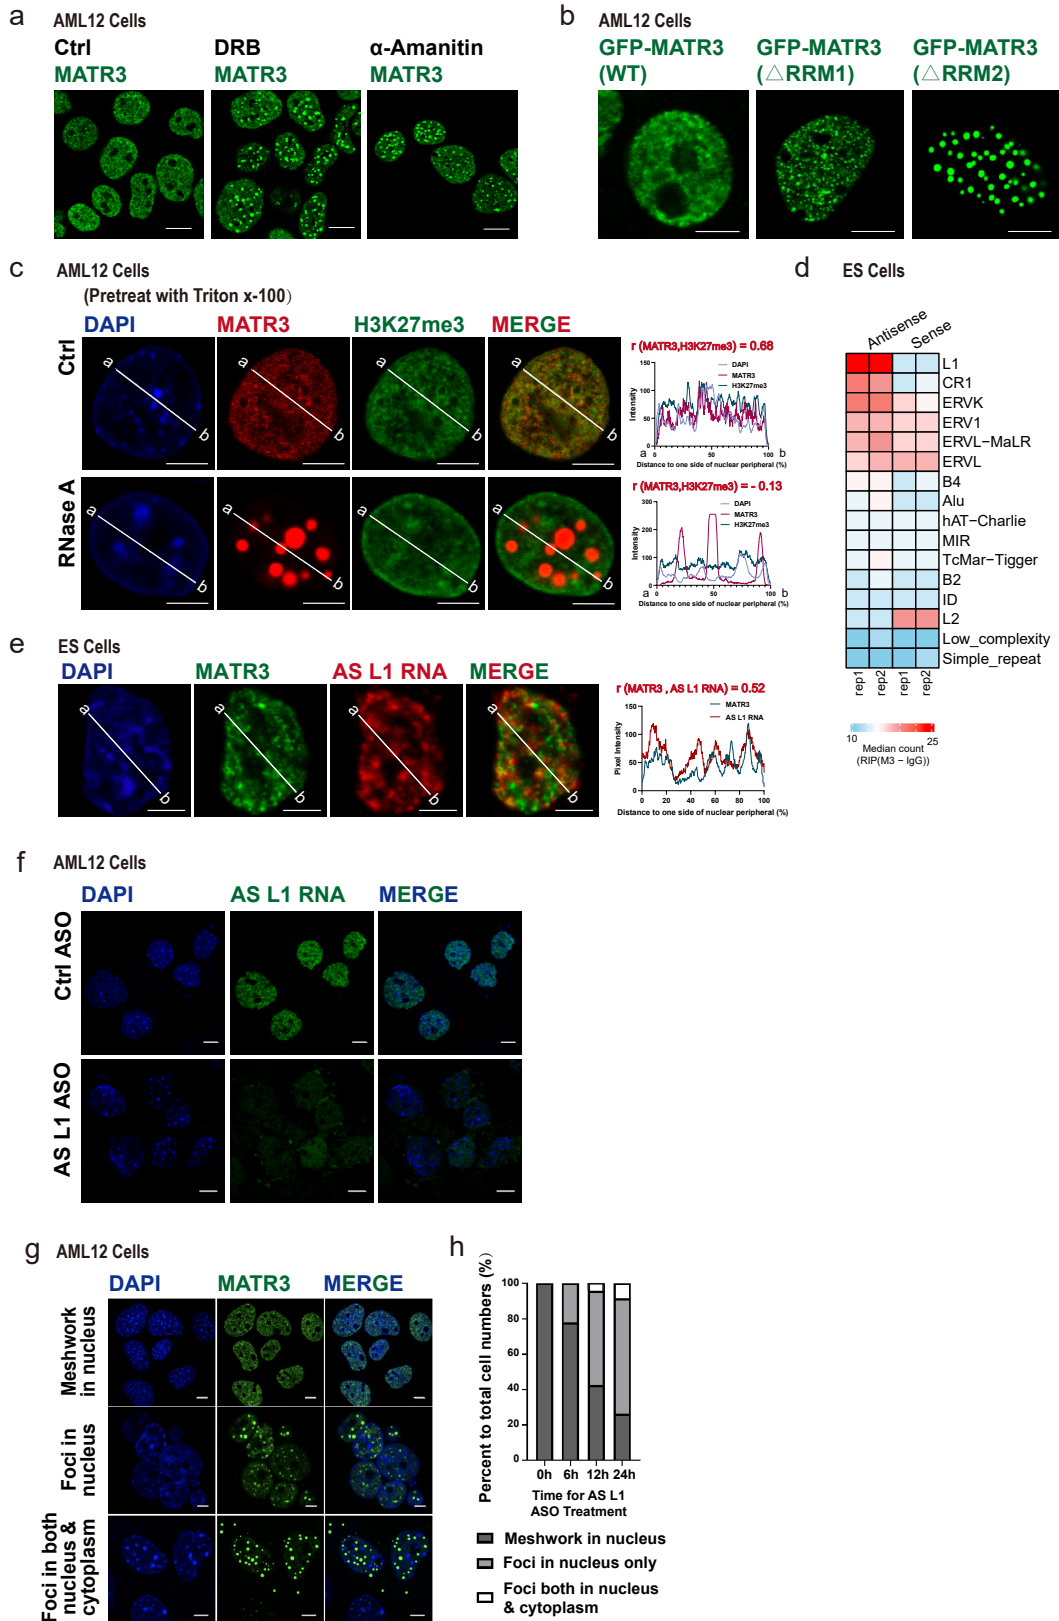

1092

1093

1094

Extended Data Fig. 2 RNAs help maintaining the meshwork structure of MATR3 proteins in nuclei.



1095 **a**, The representative cross-section image showing nuclear distribution of MATR3 after 24h  
1096 treating with 75 $\mu$ M DRB or 24h treating with 50 $\mu$ g/mL  $\alpha$ -amanitin in AML12 cells. Scale bars,  
1097 10 $\mu$ m. **b**, The representative cross-section image showing nuclear distribution of GFP-tagged  
1098 MATR3-WT, MATR3- $\Delta$ RRM1 and MATR3- $\Delta$ RRM2. **c**, (Left) The representative cross-section  
1099 image showing nuclear distribution of DAPI, MATR3 and H3K27me3 before and after RNase A  
1100 treatment (pretreat with 0.05% Triton x-100 for 30s, followed by 10 $\mu$ g/ml RNase A for 1h) in  
1101 AML12 cells. Ctrl cells were treated with 0.05% Triton x-100 for 30s. (Right) Line charts  
1102 showing pixel intensity of each channel on the ROIs. *r*, coefficient of correlation. **d**, Heatmap of  
1103 MATR3 RIP-seq sense and antisense median reads count in repetitive elements in ES cells. All  
1104 RE copies with the RIP (MATR3 -IgG) count number  $\geq$  10 are kept. Median reads counts are  
1105 measured for all copies of that RE family. **e**, (Left) Representative cross-section images showing  
1106 relative distribution between AS L1 RNA with MATR3 in ES cells. (Right) Line charts showing  
1107 pixel intensity of each channel on the ROIs. **f**, RNA FISH detection of AS L1 RNAs before and  
1108 after treating with antisense L1 ASOs. **g**, The representative intracellular distribution of MATR3  
1109 proteins before and after treating with AS L1 ASOs in AML12 cells. Scales bar, 5 $\mu$ m. **h**,  
1110 Statistical data for intracellular distribution of MATR3 proteins after 0h (n=1000), 6h (n=1280),  
1111 12h (n=1504) and 24h (n=1430) treating with AS L1 ASOs in AML12 cells. Scale bars, 5 $\mu$ m (**a**,  
1112 **b**, **c**, **e**, **f**, **g**).  
1113  
1114

### Extended Data Fig.3

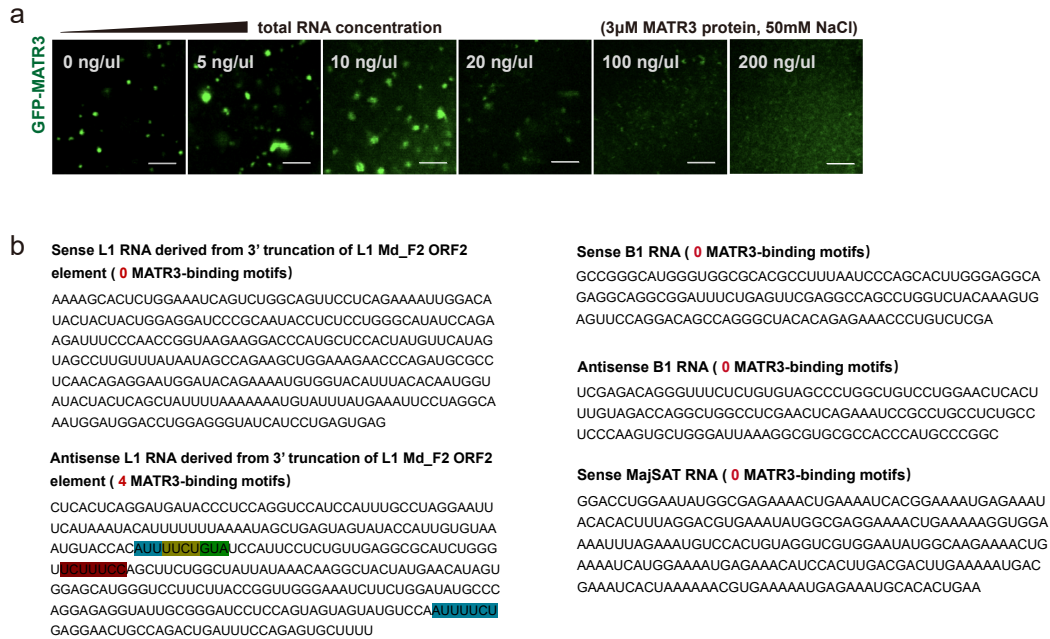

1115

1116 **Extended Data Fig. 3 MATR3 proteins interplay with RNAs in vitro.**

1117 **a**, Representative images of droplet formation assays with 3  $\mu$ M GFP-MATR3 proteins and

1118 different concentration of total RNAs. NaCl concentration, 50mM. **b**, Sequences of sense L1

1119 RNAs, anti-sense L1 RNAs, sense B1 RNAs, anti-sense B1 RNAs and sense MajSAT RNAs used

1120 in droplet formation assays. The 7-mer MATR3-binding motifs are highlighted.

1121

### Extended Data Fig.4

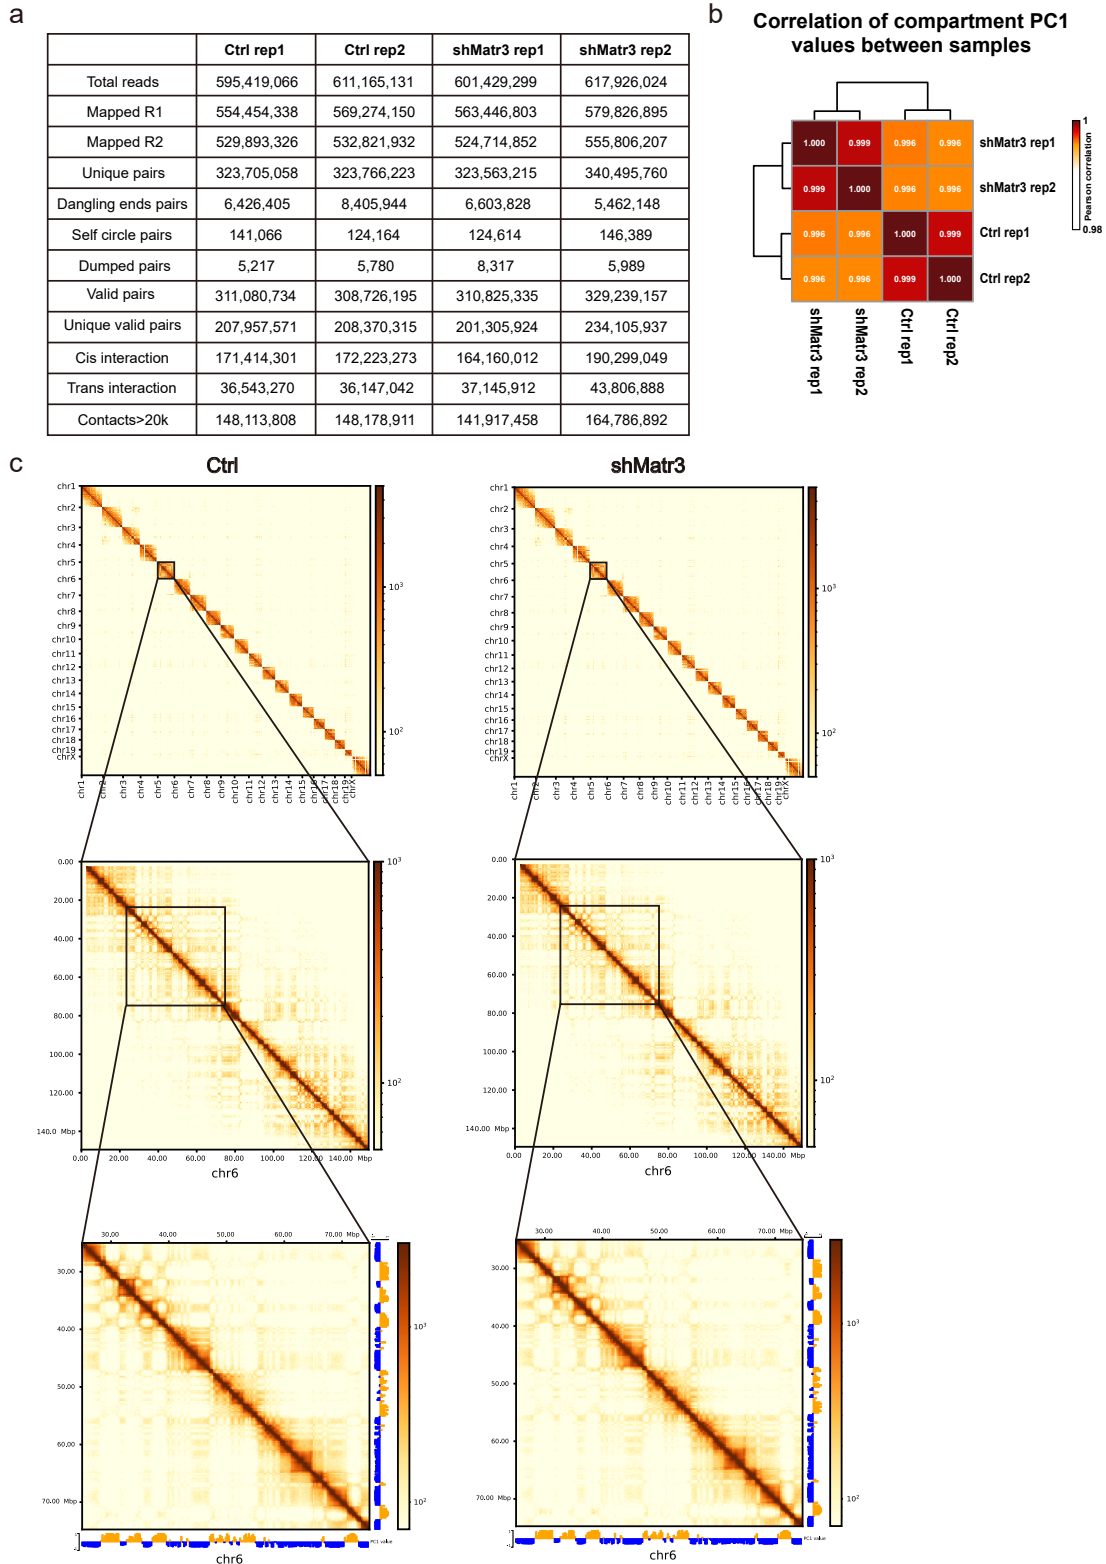

1122

1123 **Extended Data Fig. 4** The overall view of Hi-C datasets.

1124 **a**, Mapping statistics of Hi-C sequencing data of two replicates in Ctrl and shMatr3. **b**, Pearson

1125 correlation coefficients of PC1 values at 250 kb resolution between replicates. **c**, Hi-C contact

1126 maps in Ctrl and shMatr3: whole genome at 1MB resolution (top); Chr6 at 250kb resolution  
1127 (middle); chr6:27-73 Mb at 250kb resolution (down).  
1128

### Extended Data Fig.5

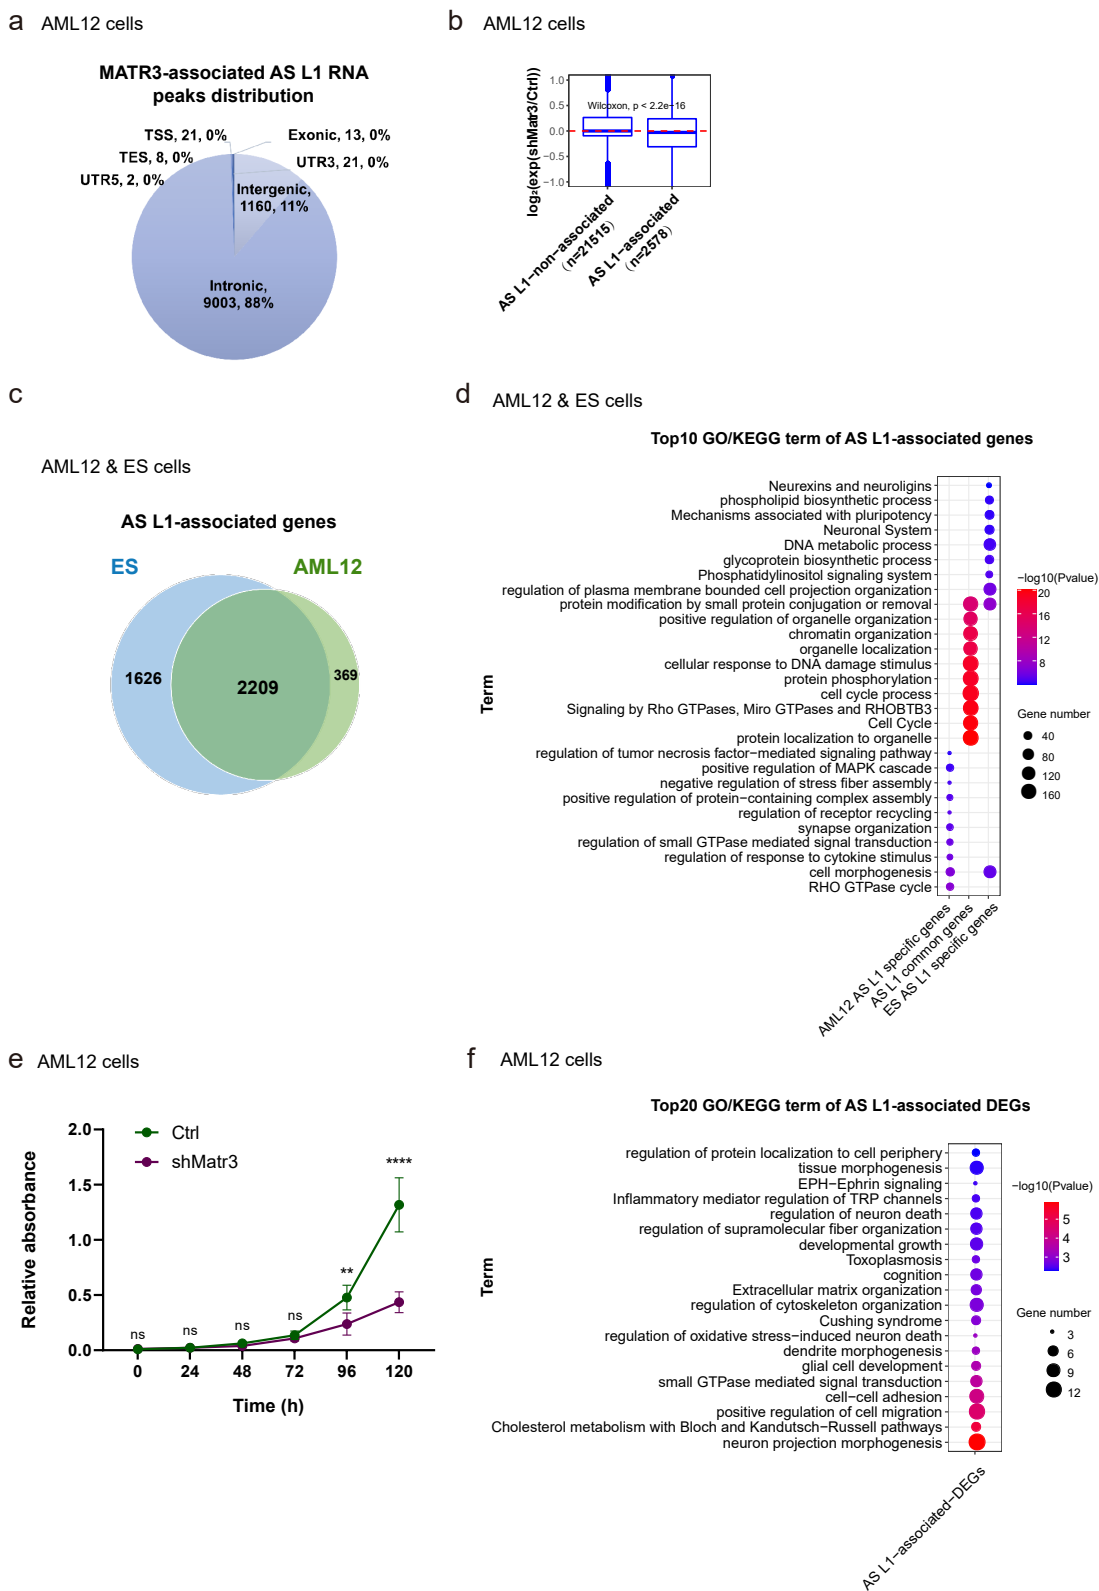

1129

1130

### Extended Data Fig. 5 Functional relevance of MATR3-AS L1 RNA associated genes

1131

**a**, Genomic distribution of MATR3-AS L1 RNAs loci in AML12 cells. **b**, Box plot shows gene

1132

expression changes in MATR3-AS L1 RNAs associated TADs and non-associated TADs. **c**,

1133 Genes that enriched with MATR3-AS L1 RNAs overlap between ESC and AML12 cells. **d**, Top  
1134 enriched GO/KEGG terms for genes from groups in **c**. **e**, Viability of AML12 cells before and  
1135 after MATR3 knockdown as detected by CCK-8 assay (n = 7). **f**, Top enriched GO/KEGG terms  
1136 for AS L1- associated DEGs (Ctrl vs shMatr3) from AML12 cells. Error bars indicate mean  $\pm$  s.d.  
1137

## Extended Data Fig.6

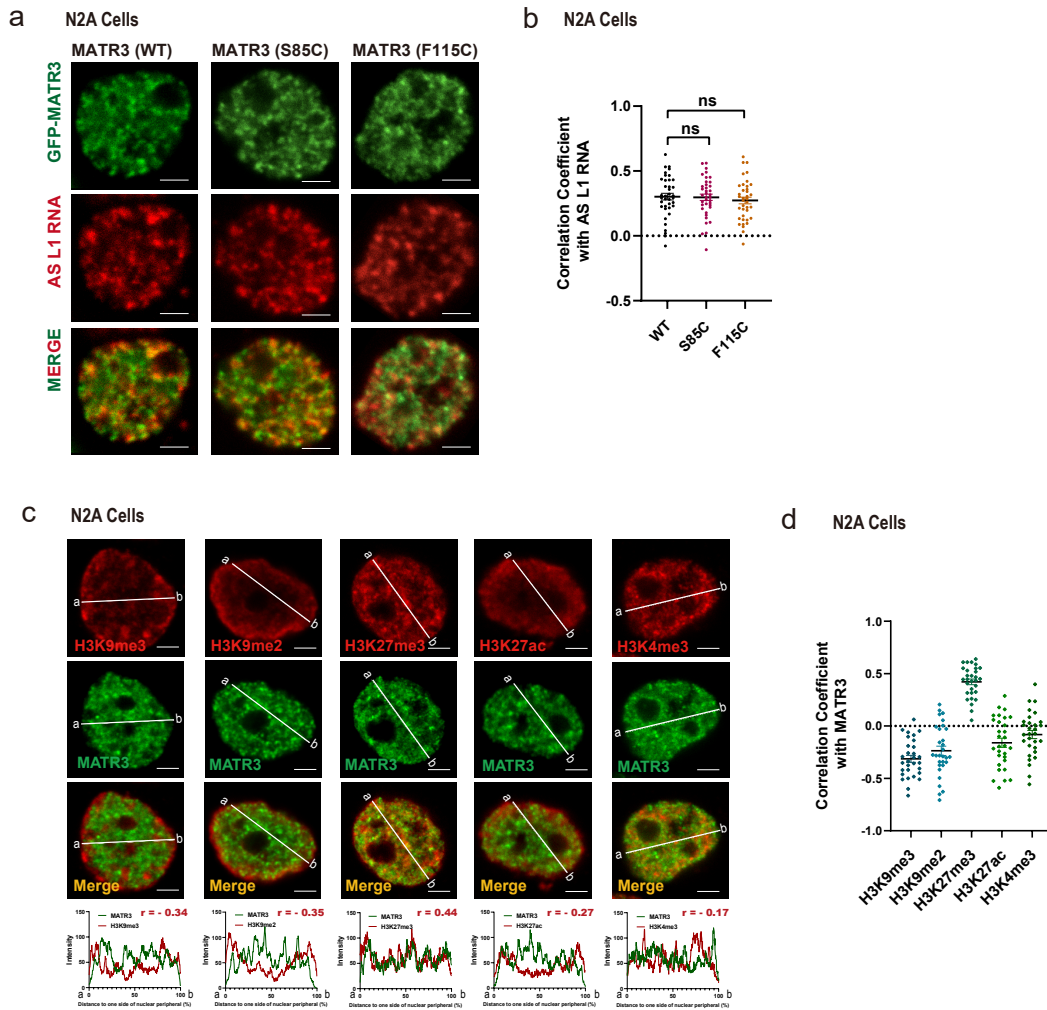

1138

1139 **Extended Data Fig. 6. Nuclear distribution pattern of ALS associated mutants in N2A cells.**

1140 **a**, Representative images showing nuclear colocalization of AS L1 RNAs with wild-type (WT)

1141 and mutant (S85C/F115C) GFP-MATR3 proteins in N2A cells. **b**, Coefficient of correlation

1142 between AS L1 RNA with wild-type and mutant GFP-MATR3 proteins. WT (n=38), S85C

1143 (n=38), F115C (n=38). The P values were calculated using unpaired two-tailed Student's t test; ns,

1144 not significant. **c**, (Upper) Representative cross-section images showing relative distribution

1145 between MATR3 and histone modifications (H3K9me3, H3K9me2, H3K27me3, H3K27ac and

1146 H3K4me3) in N2A cells. (Lower) Line charts showing pixel intensity of each channel on the

1147 regions of interest (ROI). r, coefficient of correlation. **d**, Coefficient of correlation between

1148 MATR3 and histone modification H3K9me3 (n=30), H3K9me2 (n=30), H3K27me3 (n=30),

1149 H3K27ac (n=30) and H3K4me3 (n=30) in N2A cells. Quantifications were performed on

1150 randomly selected ROIs in cell nuclei. Each point represents one cell. Error bars indicate mean  $\pm$

1151 s.e.m. Scale bars, 5 $\mu$ m (a, c).

1152

1153 **Supplementary Video. 1. *In vitro* droplet formation video of hMATR3 (WT)**

1154 Representative time-lapse video of droplet formation assay with 3 $\mu$ M GFP-hMATR3 (WT). NaCl  
1155 concentration, 50mM. Images were captured for 56.760 s at 1.290 s per frame. Scale bar, 2.5  $\mu$ m.

1156

1157 **Supplementary Video. 2. *In vitro* liquid formation video of hMATR3 (S85C)**

1158 Representative time-lapse video of droplet formation assay with 3 $\mu$ M GFP-hMATR3 (S85C).

1159 NaCl concentration, 50mM. Images were captured for 39.990 s at 1.290 s per frame. Scale bar,

1160 2.5  $\mu$ m.
